# Supplementary material
Source: Royal Society of Chemistry journal article supplement (doi:10.1039/d6ta01587e)
Supplement: d6ta01587e1.pdf [file d6ta01587e1.pdf]

## **Modulating Exciton Dissociation and Charge Transfer by Extending $\pi$ -conjugation in Thiazole-based COFs to Boost Photocatalytic Hydrogen Evolution**

Jianing Tang<sup>a</sup>, Jinfeng Wang<sup>\*a</sup>, Ziang Song<sup>a</sup>, Man Wang<sup>a</sup>, Haitao Song<sup>a</sup>, Yujun Xie<sup>\*a</sup> and Zhen Li<sup>\*a, b, c</sup>

<sup>a</sup> Institute of Molecular Aggregation Science, Tianjin University, Tianjin 300072, China

Emails: [jinfeng.wang@tju.edu.cn](mailto:jinfeng.wang@tju.edu.cn), [xieyujun@tju.edu.cn](mailto:xieyujun@tju.edu.cn), [lizhen@whu.edu.cn](mailto:lizhen@whu.edu.cn).

<sup>b</sup> Hubei Key Lab on Organic and Polymeric Opto-Electronic Materials, Department of Chemistry, Wuhan University, Wuhan, Hubei, 430072, China

Email: [lizhen@whu.edu.cn](mailto:lizhen@whu.edu.cn).

<sup>c</sup> College of Chemistry and Chemical Engineering, Hubei University, Wuhan 430072, China

## Table of Contents

|                                                    |    |
|----------------------------------------------------|----|
| Section I. Synthetic procedures .....              | 3  |
| Section II. Supplementary figures and tables ..... | 5  |
| Section III. Supplementary References .....        | 35 |

## Section I. Synthetic procedures

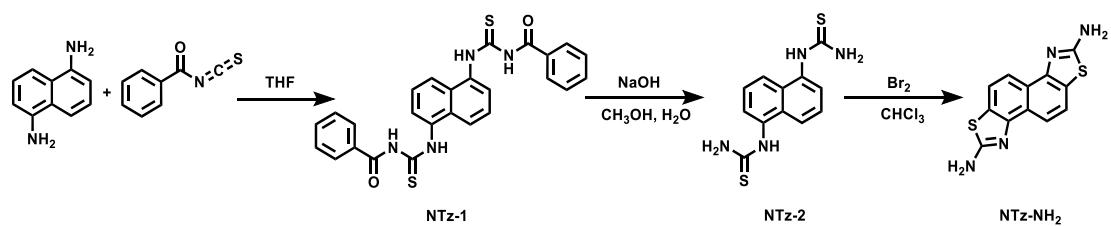

**Fig. S1.** The synthetic route of NTz-NH<sub>2</sub>.

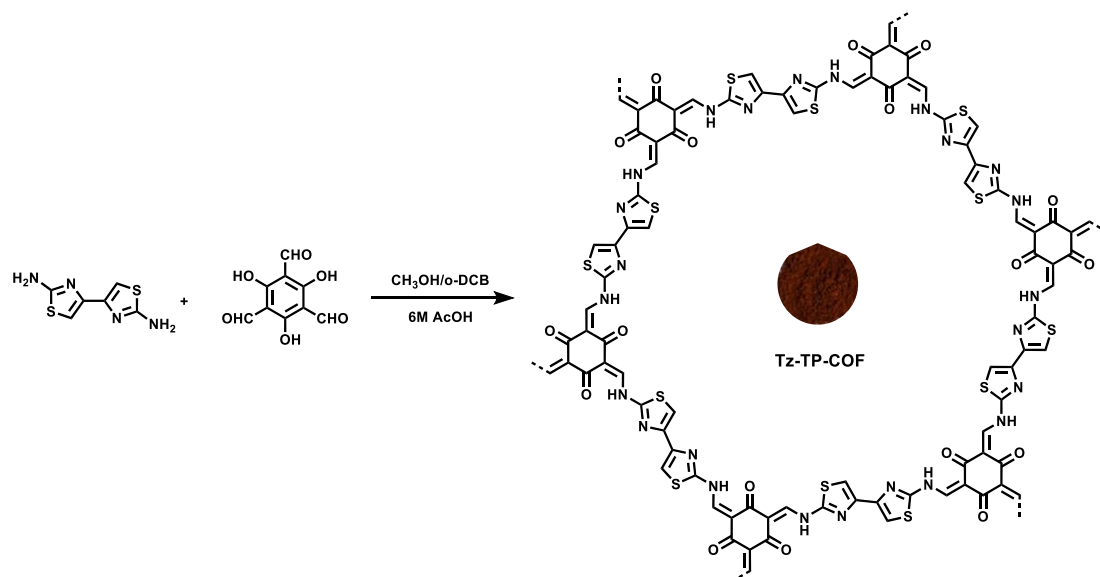

**Fig. S2.** The synthetic route of Tz-TP-COF.

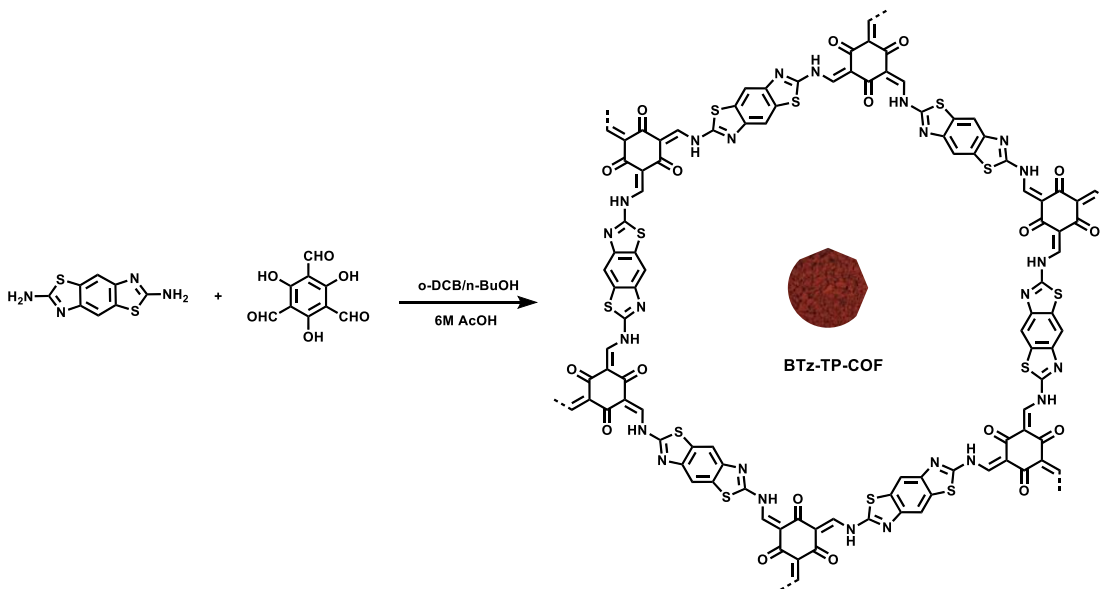

**Fig. S3.** The synthetic route of BTz-TP-COF.

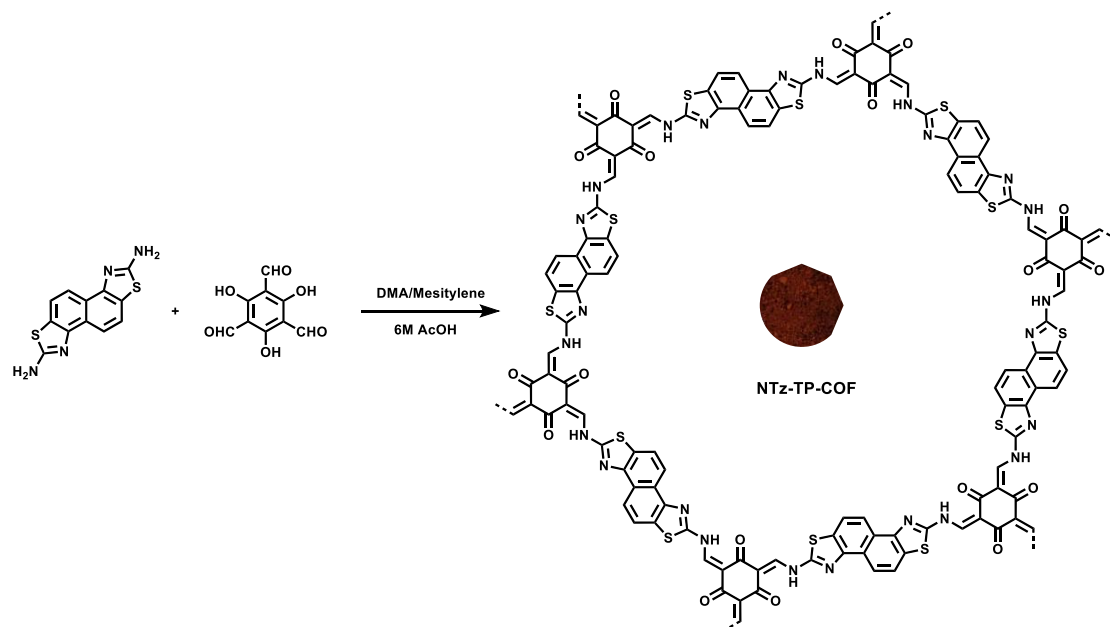

**Fig. S4.** The synthetic route of NTz-TP-COF.

Section II. Supplementary figures and tables

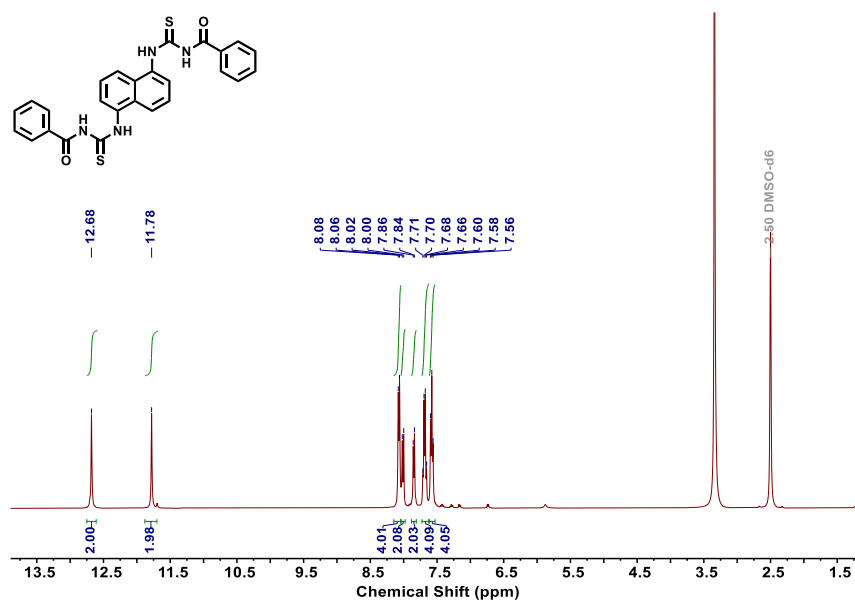

Fig. S5. <sup>1</sup>H NMR spectrum of NTz-1.

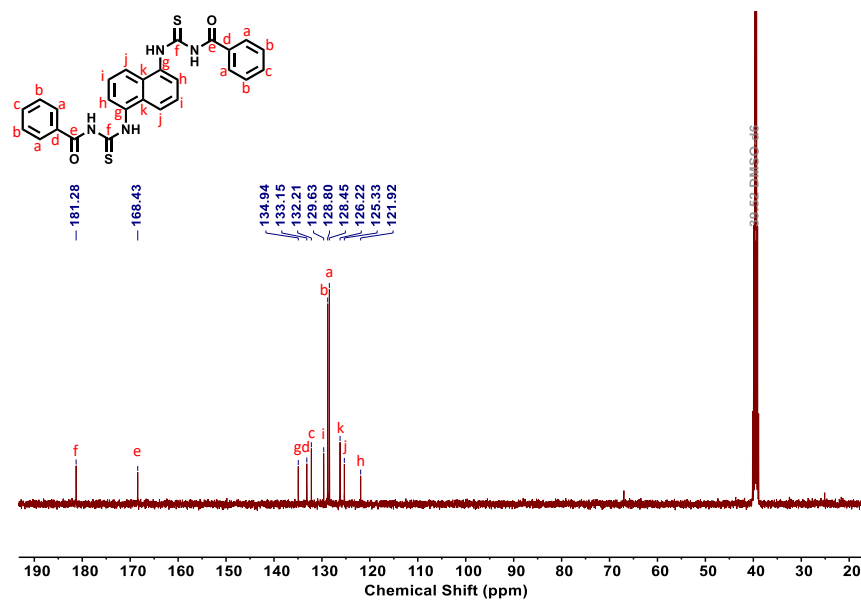

Fig. S6. <sup>13</sup>C NMR spectrum of NTz-1.

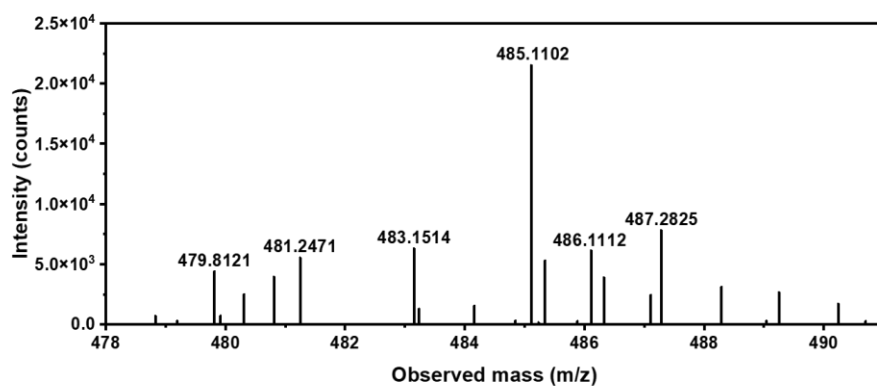

Fig. S7. HRMS spectrum of NTz-1.

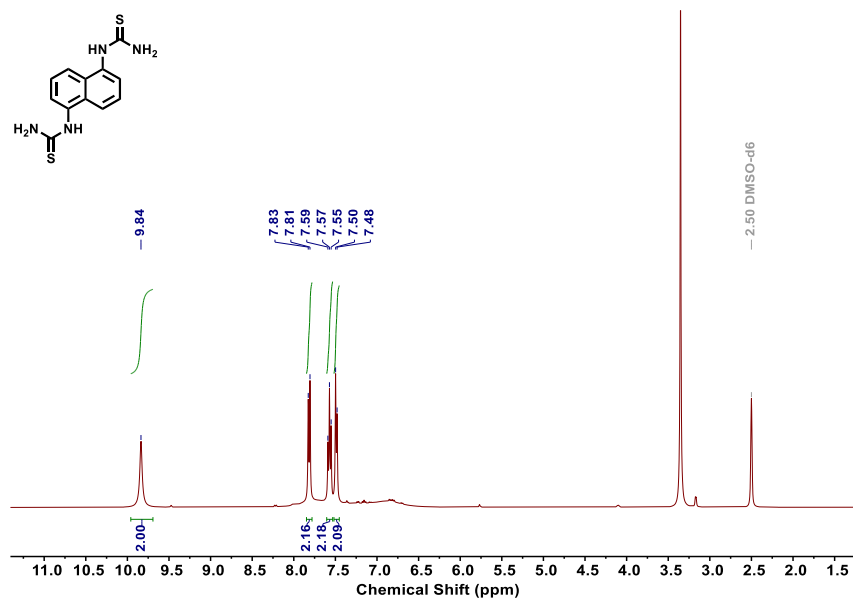

Fig. S8. <sup>1</sup>H NMR spectrum of NTz-2.

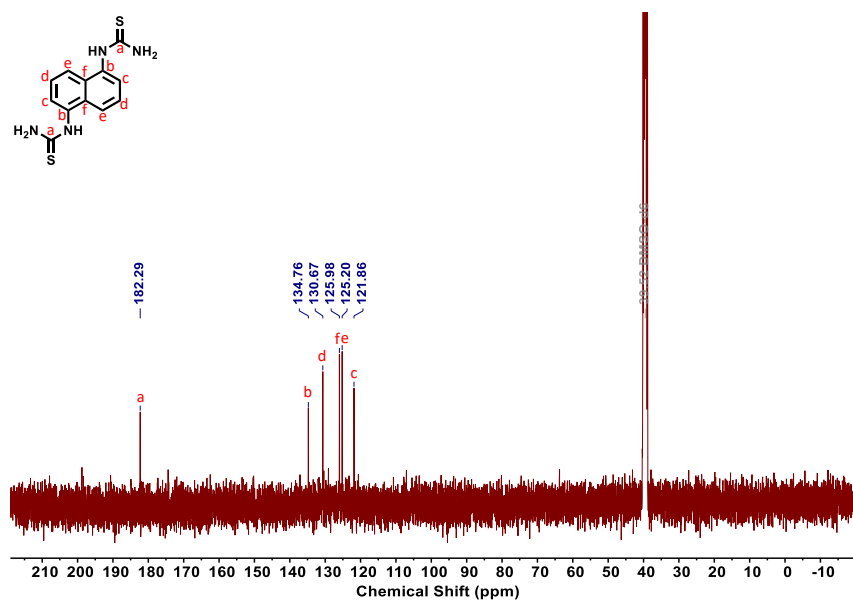

Fig. S9. <sup>13</sup>C NMR spectrum of NTz-2.

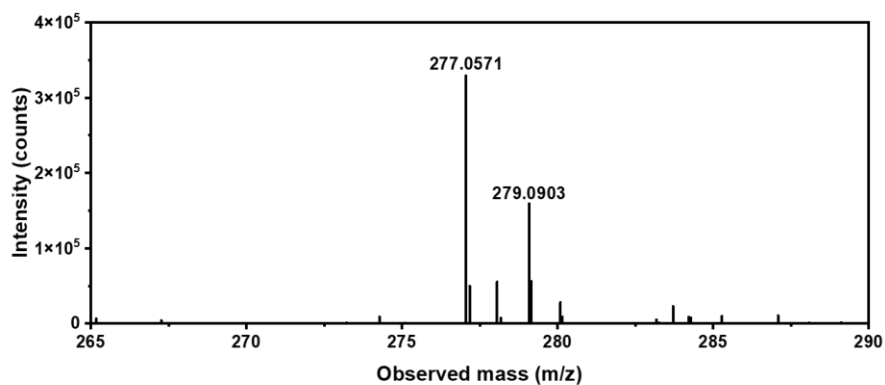

Fig. S10. HRMS spectrum of NTz-2.

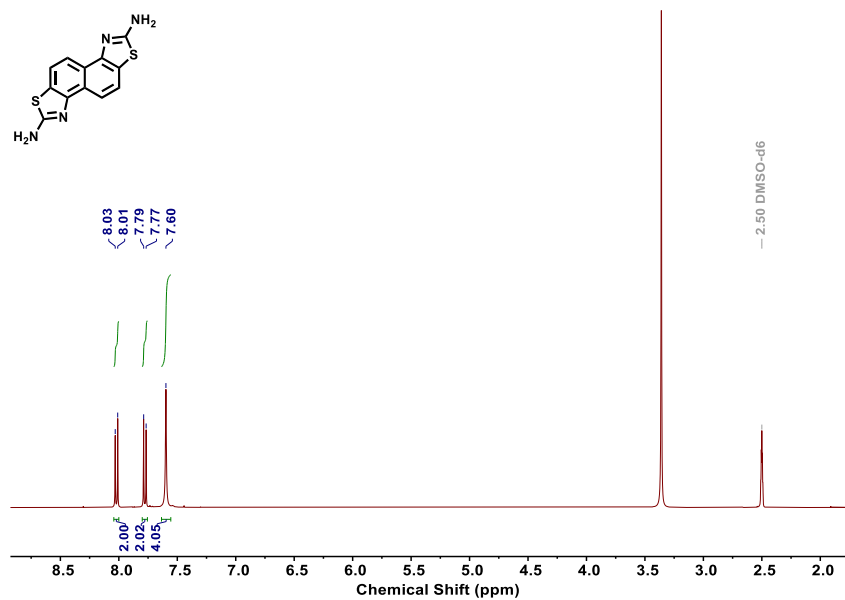

Fig. S11. <sup>1</sup>H NMR spectrum of NTz-NH<sub>2</sub>.

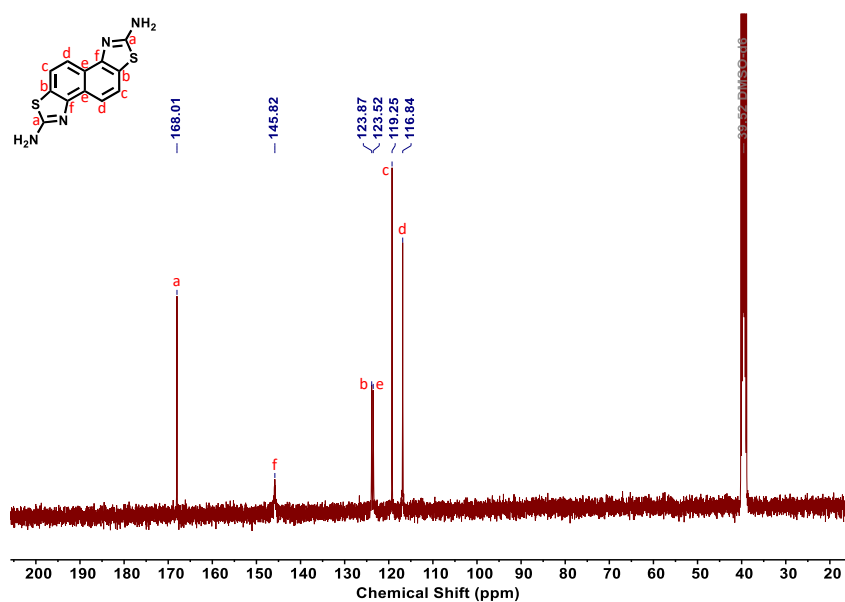

Fig. S12. <sup>13</sup>C NMR spectrum of NTz-NH<sub>2</sub>.

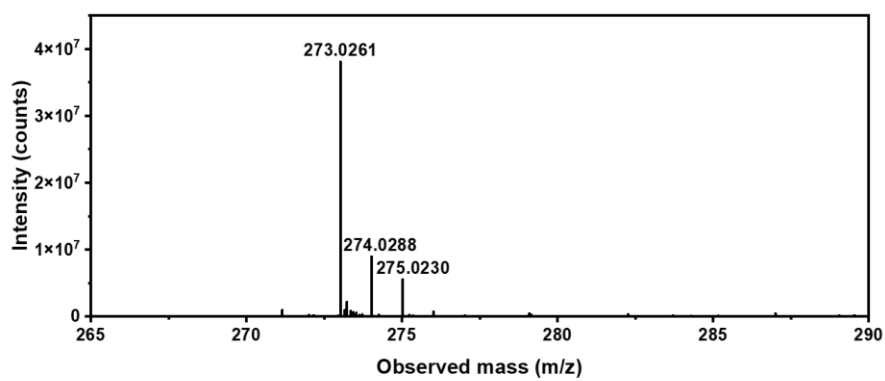

Fig. S13. HRMS spectrum of NTz-NH<sub>2</sub>.

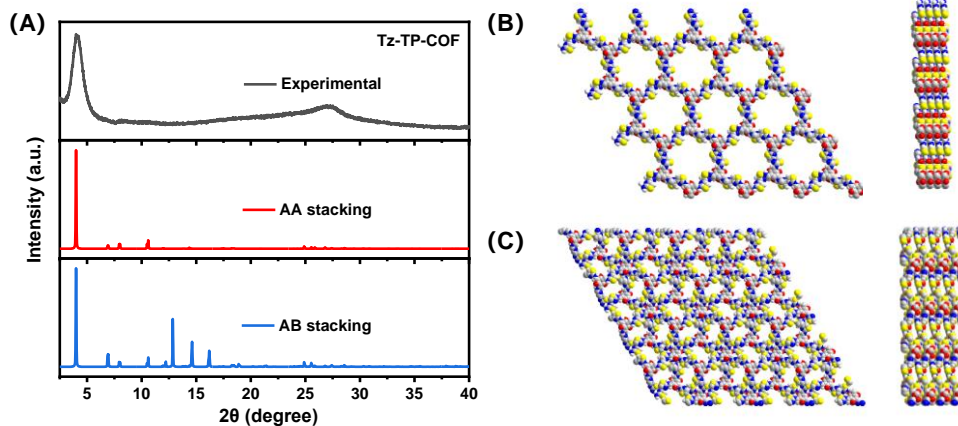

**Fig. S14.** (A) The experimental, simulated AA stacking, simulated AB stacking of Tz-TP-COF. (B) Top view and side view of simulated AA stacking. (C) Top view and side view of simulated AB stacking.

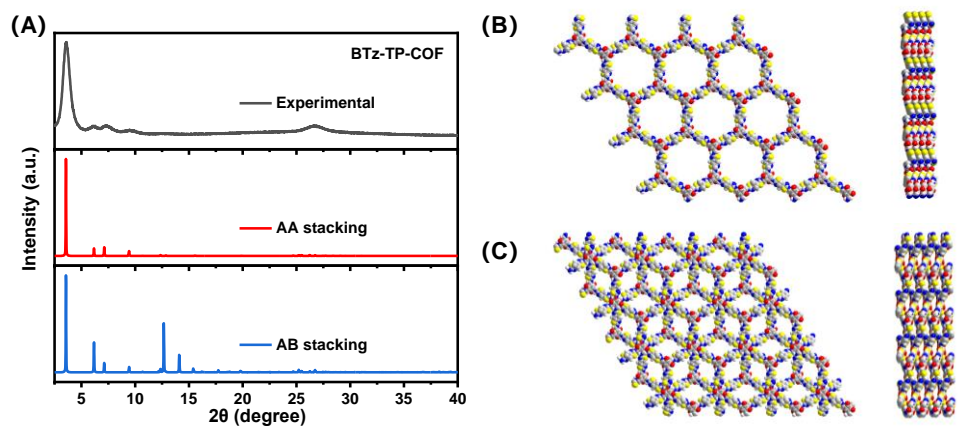

**Fig. S15.** (A) The experimental, simulated AA stacking, simulated AB stacking of BTz-TP-COF. (B) Top view and side view of simulated AA stacking. (C) Top view and side view of simulated AB stacking.

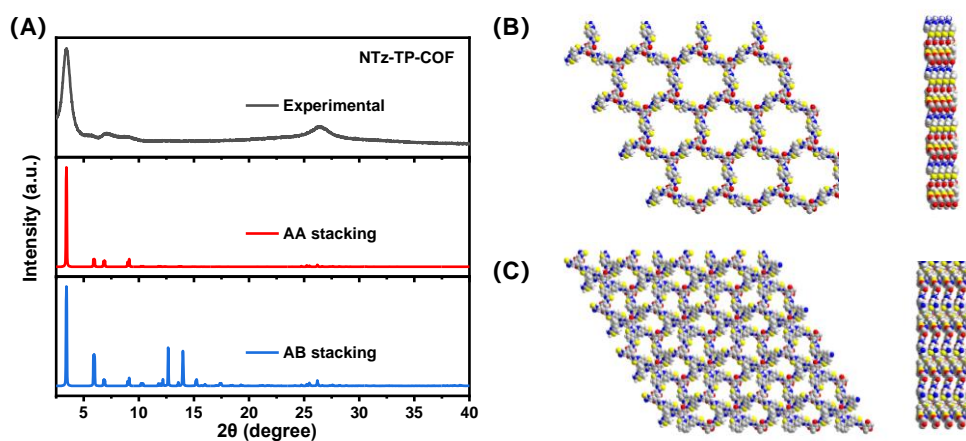

**Fig. S16.** (A) The experimental, simulated AA stacking, simulated AB stacking of NTz-TP-COF. (B) Top view and side view of simulated AA stacking. (C) Top view and side view of simulated AB stacking.

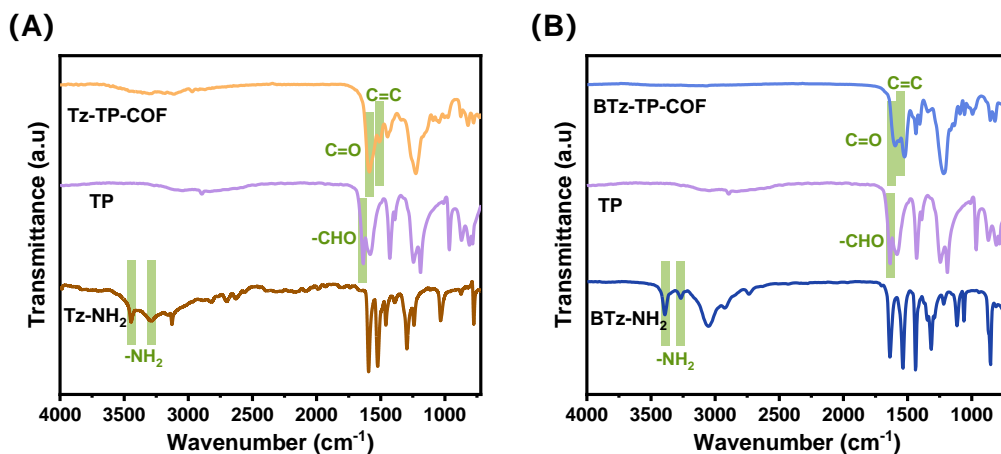

Fig. S17. FT-IR spectra of (A) Tz-TP-COF, TP and Tz-NH<sub>2</sub>, (B) BTz-TP-COF, TP and BTz-NH<sub>2</sub>.

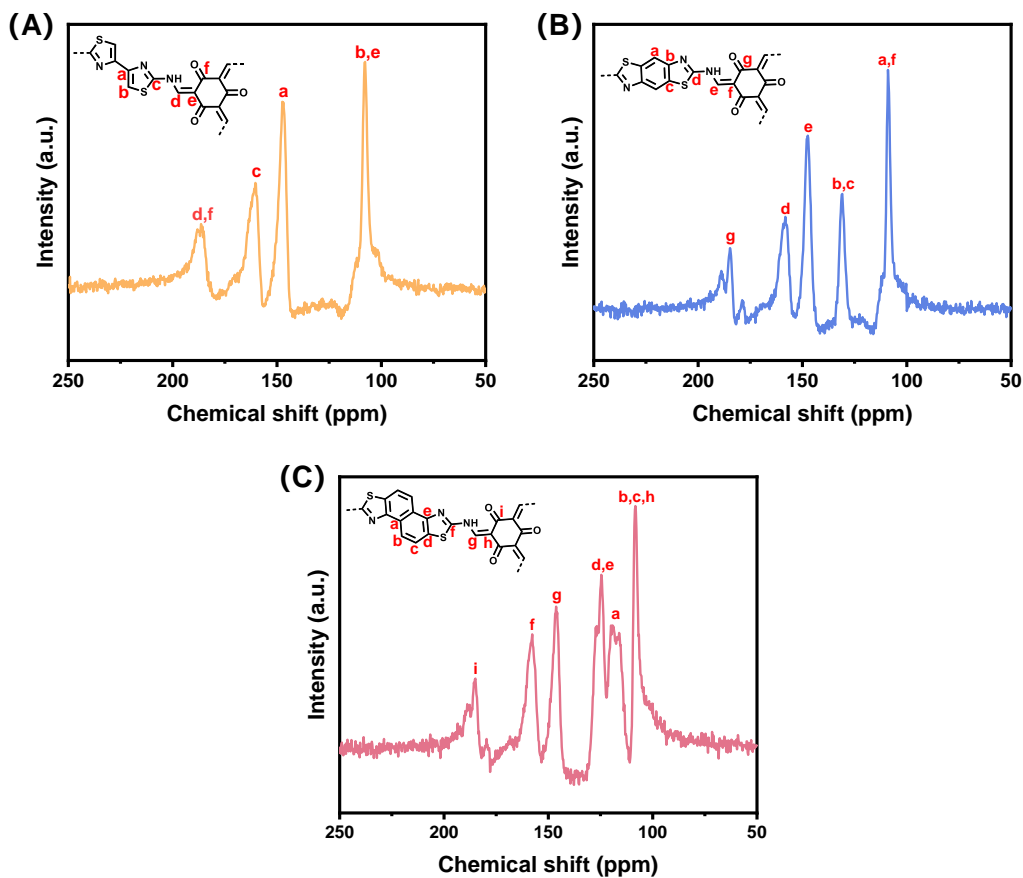

Fig. S18. Solid state <sup>13</sup>C CP/MAS NMR spectra of (A) Tz-TP-COF, (B) BTz-TP-COF and (C) NTz-TP-COF.

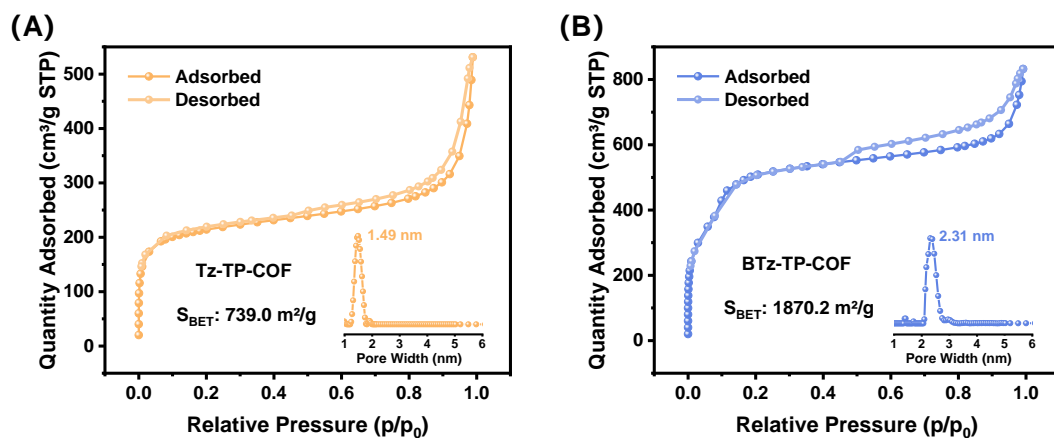

**Fig. S19.** (A) N<sub>2</sub> adsorption-desorption isotherm of Tz-TP-COF at 77 K (adsorption: deep orange; desorption: light orange). Inset: Pore size distribution curve. (B) N<sub>2</sub> adsorption-desorption isotherm of BTz-TP-COF at 77 K (adsorption: deep blue; desorption: light blue). Inset: Pore size distribution curve.

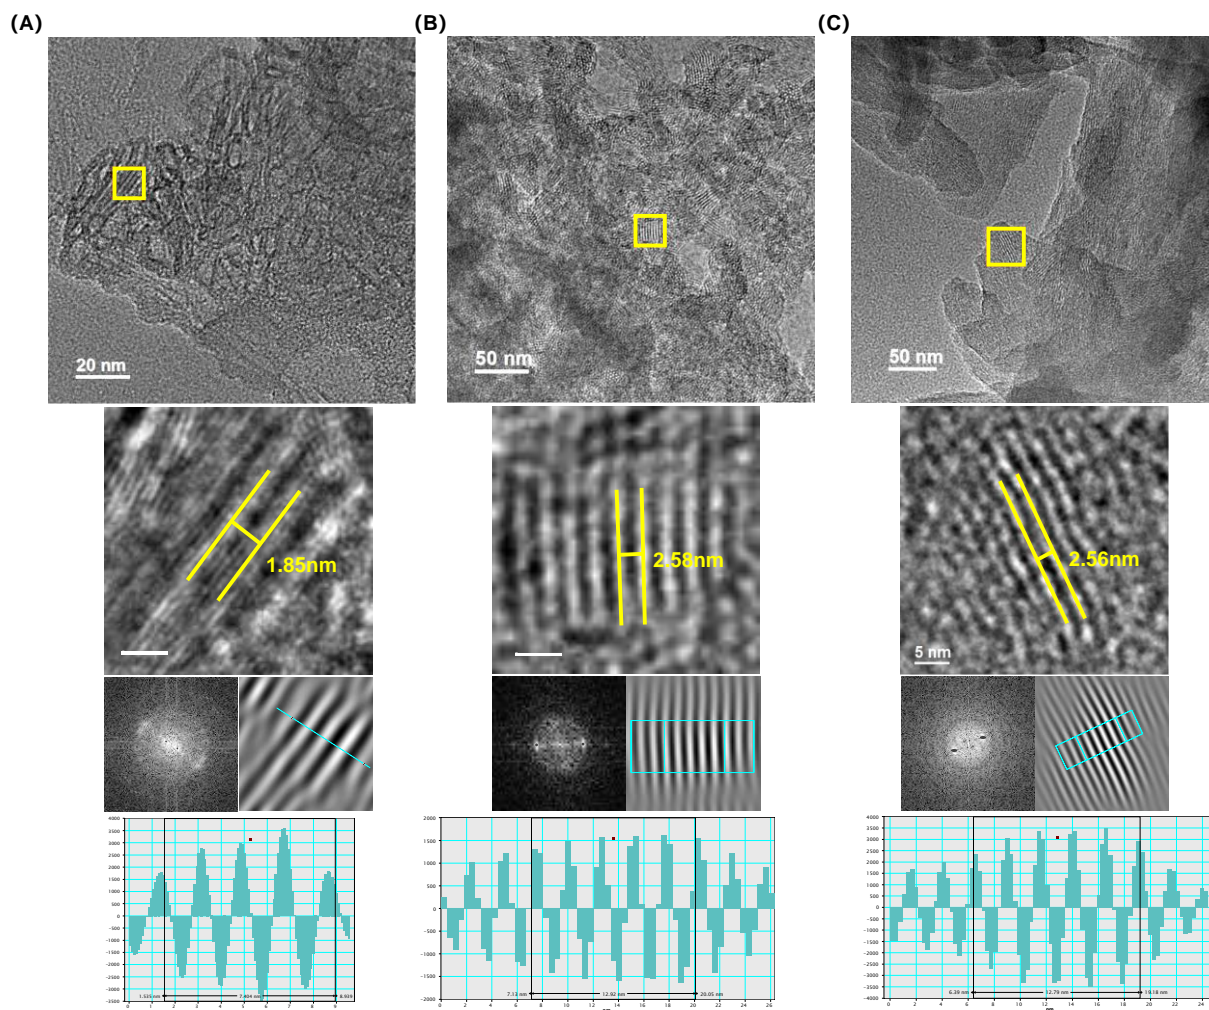

**Fig. S20.** High-resolution TEM image, Fast Fourier transform of HRTEM and crystal lattice spacing of (A) Tz-TP-COF, (B) BTz-TP-COF and (C) NTz-TP-COF.

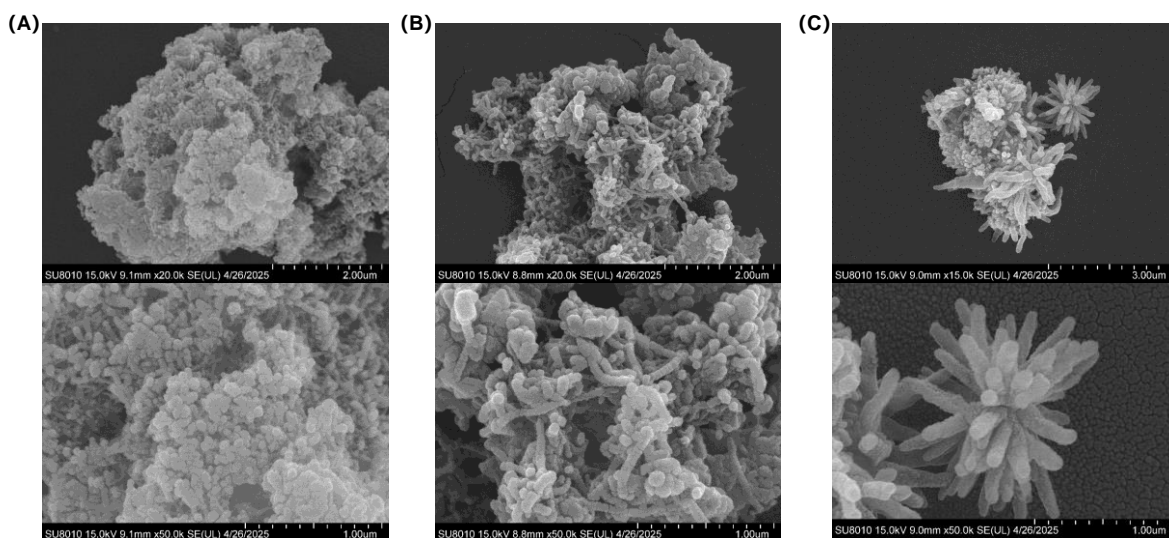

**Fig. S21.** SEM images of (A) Tz-TP-COF, (B) BTz-TP-COF and (C) NTz-TP-COF.

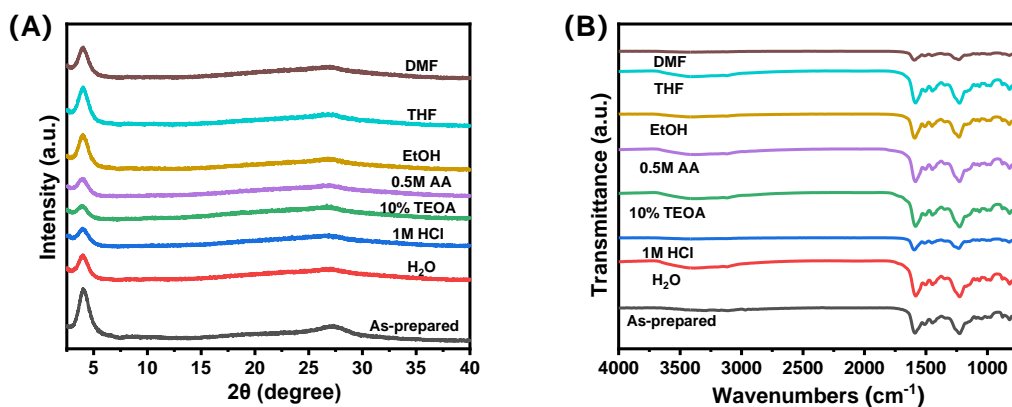

**Fig. S22.** (A) XRD pattern and (B) FT-IR spectra of Tz-TP-COF after various treatments for 24 h.

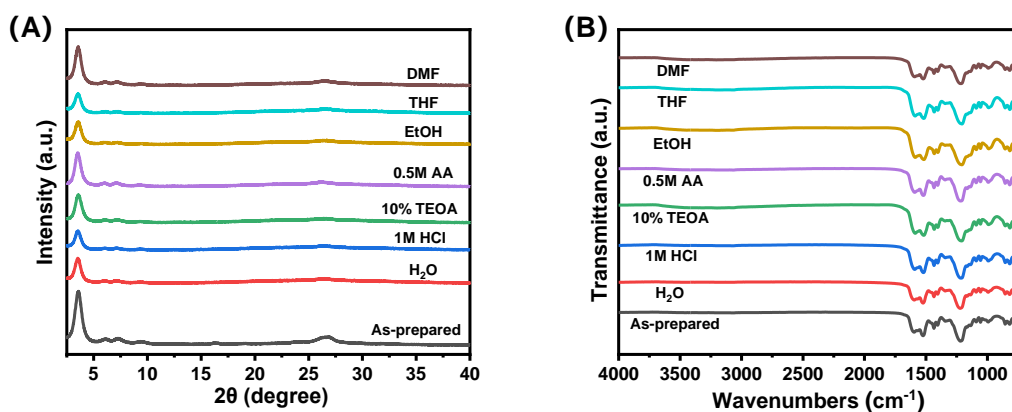

**Fig. S23.** (A) XRD pattern and (B) FT-IR spectra of BTz-TP-COF after various treatments for 24 h.

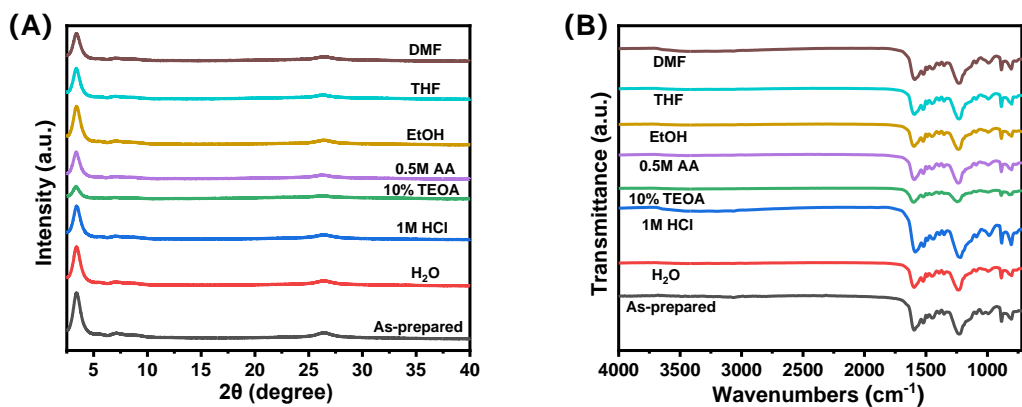

Fig. S24. (A) PXRD pattern and (B) FT-IR spectra of NTz-TP-COF after various treatments for 24 h.

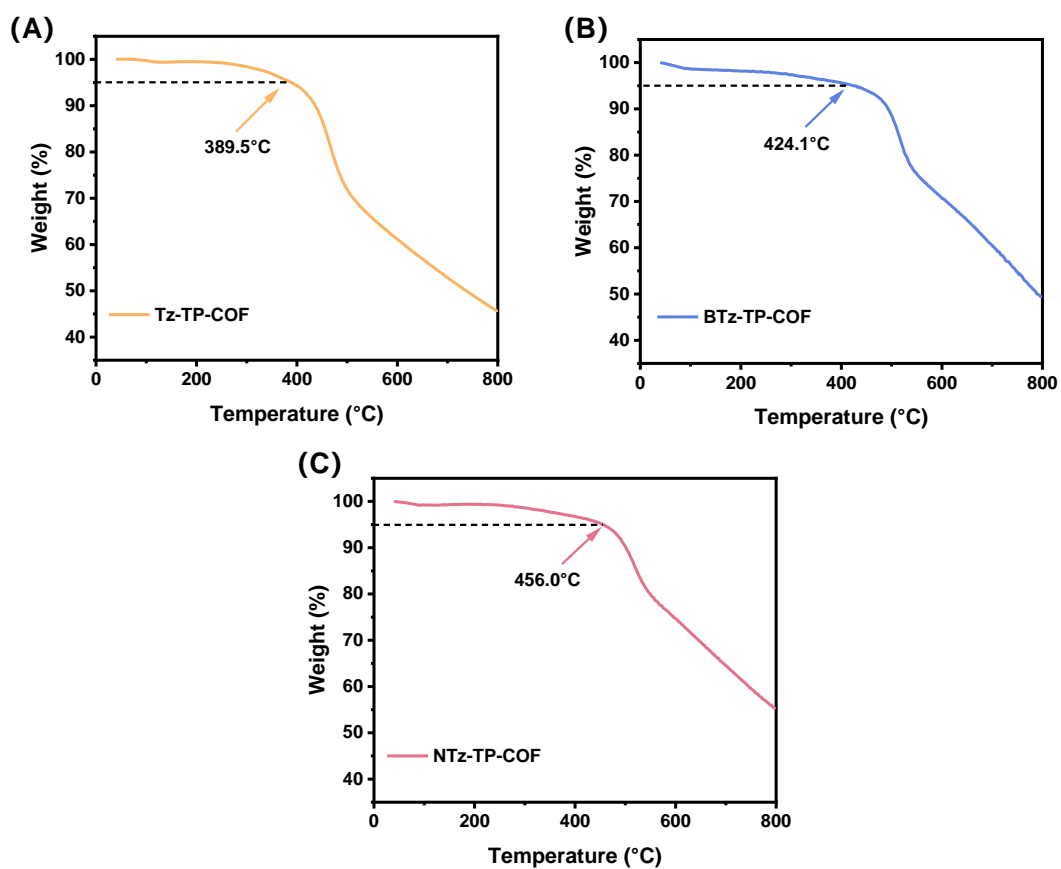

Fig. S25. TGA profiles of (A) Tz-TP-COF, (B) BTz-TP-COF and (C) NTz-TP-COF.

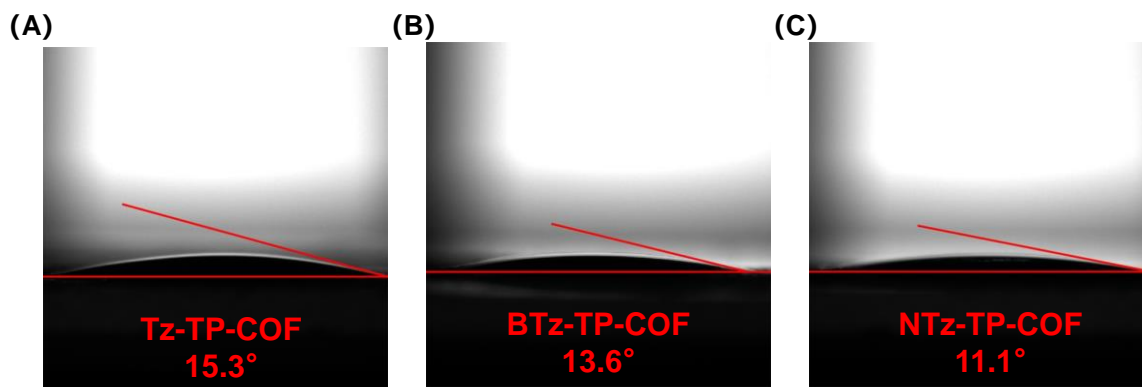

**Fig. S26.** Contact angles of (A) Tz-TP-COF, (B) BTz-TP-COF and (C) NTz-TP-COF.

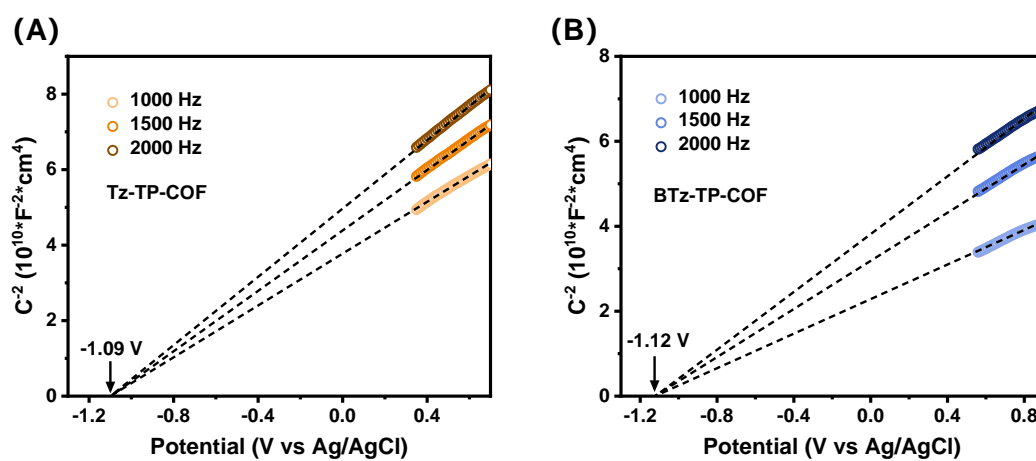

**Fig. S27.** Mott-Schottky (M-S) plot for Tz-TP-COF(A) and BTz-TP-COF(B) measured in  $\text{Na}_2\text{SO}_4$  (0.2 M, pH = 6.8) with Ag/AgCl electrode as the reference electrode in dark.

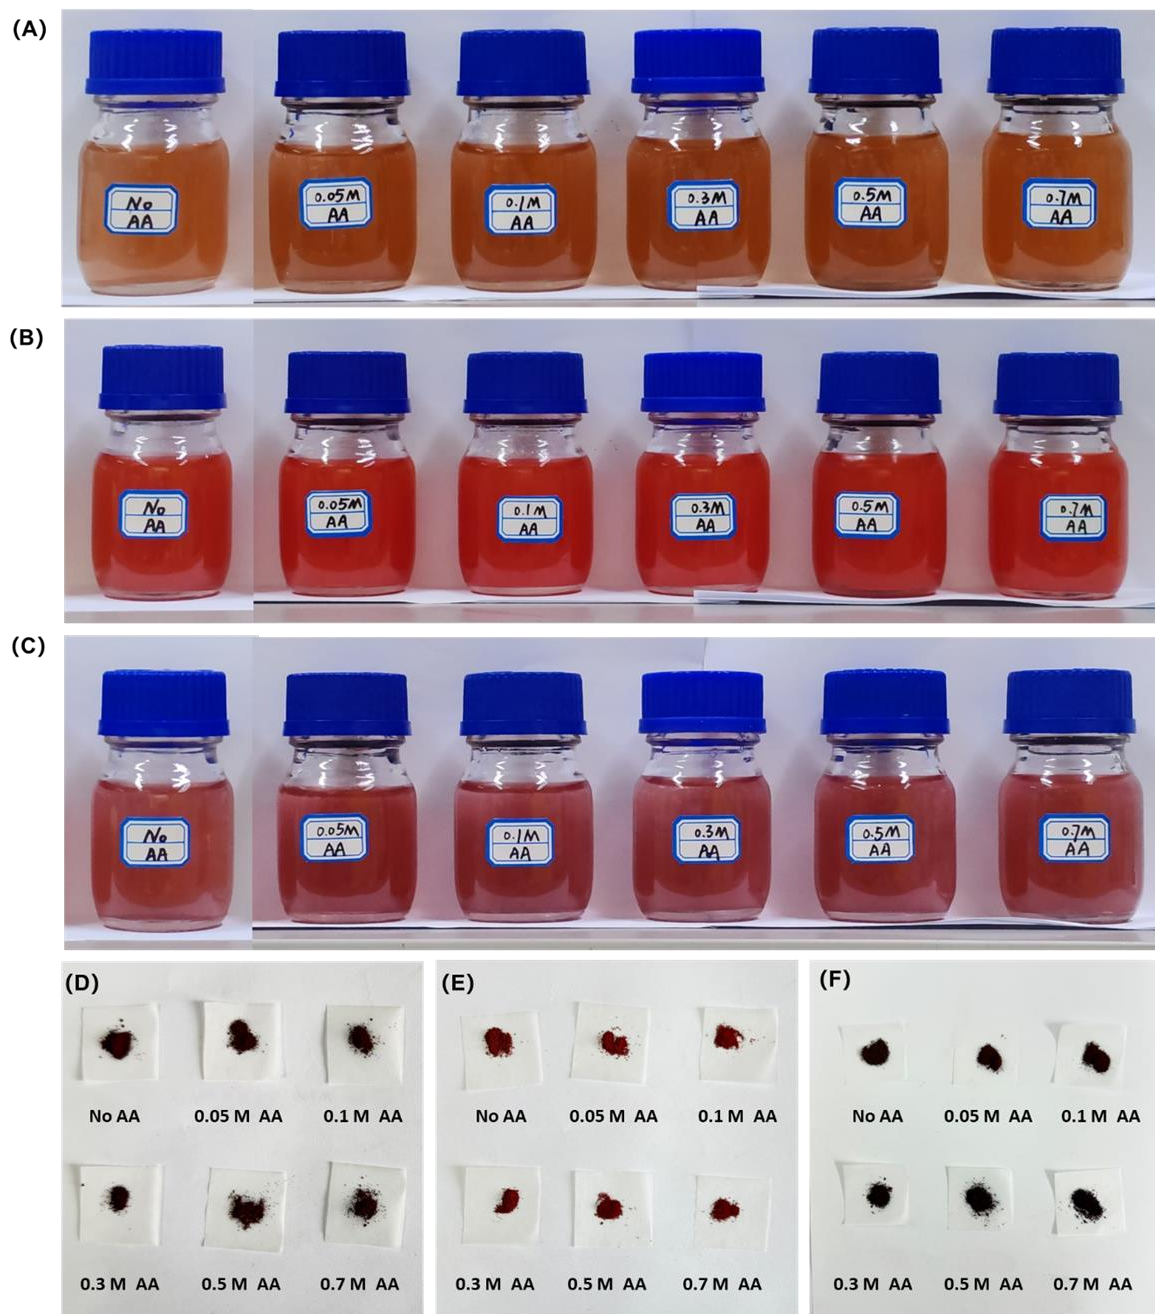

**Fig. S28.** (A-C) Dispersions of 5 mg Tz-TP-COF (A), BTz-TP-COF (B), and NTz-TP-COF (C) in deionized water, 0.05 M AA, 0.1 M AA, 0.3 M AA, 0.5 M AA, and 0.7 M AA solutions, respectively. (D-F) Tz-TP-COF (D), BTz-TP-COF (E), and NTz-TP-COF (F) obtained by filtration after immersion in the different concentrations of AA solutions.

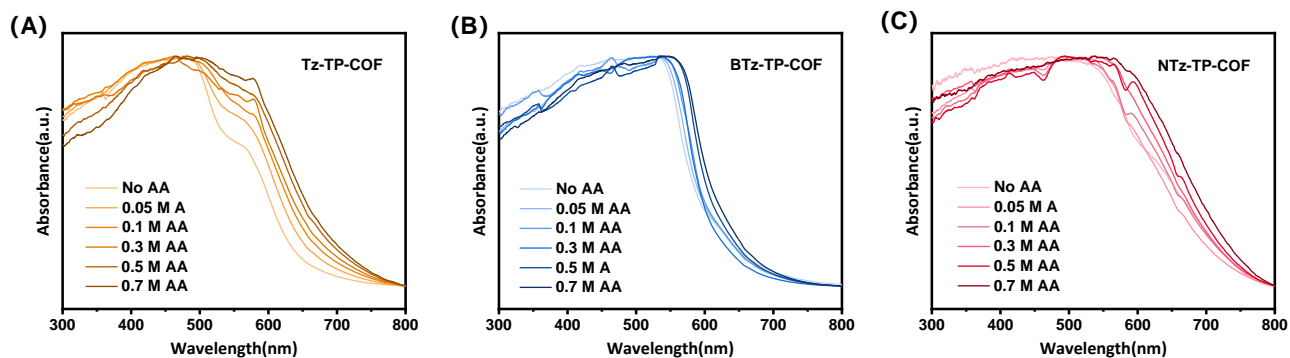

**Fig. S29.** UV-Vis DRS of Tz-TP-COF (A), BTz-TP-COF (B), and NTz-TP-COF (C) before and after protonation.

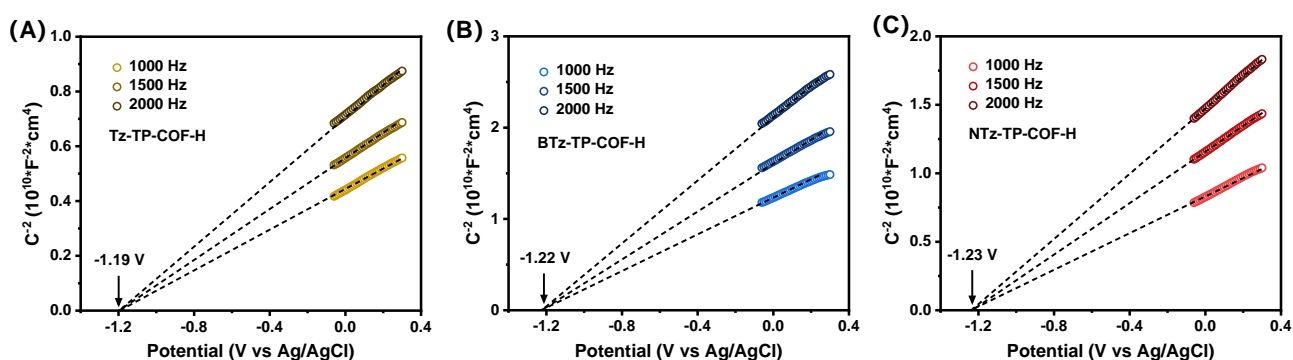

**Fig. S30.** Mott-Schottky (M-S) plots for Tz-TP-COF (A), BTz-TP-COF (B) and NTz-TP-COF (C) measured in an electrolyte consisting of 0.5 M AA and 0.2 M  $\text{Na}_2\text{SO}_4$  (pH = 2.4), using an Ag/AgCl reference electrode, under dark conditions.

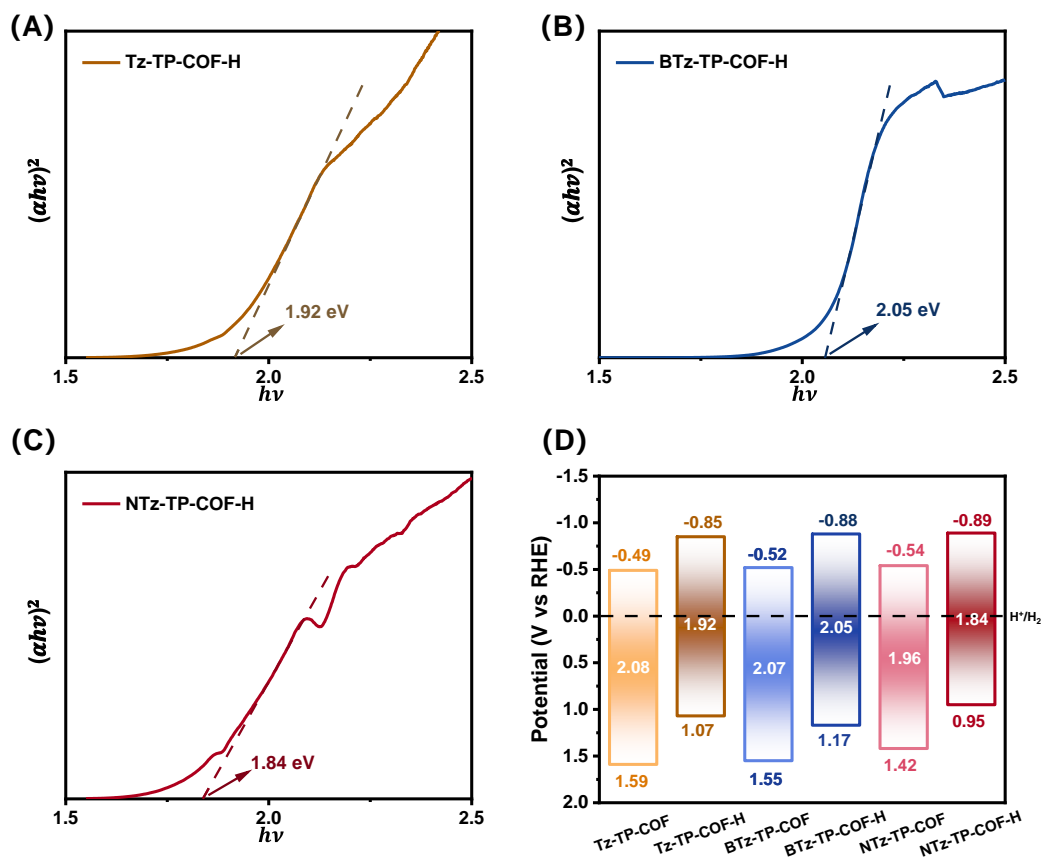

**Fig. S31.** (A-C) Bandgaps of Tz-TP-COF (A), BTz-TP-COF (B), and NTz-TP-COF (C) calculated using the Tauc plot method after protonation in 0.5 M AA. (D) Comparative electronic band structures of Tz-TP-COF, BTz-TP-COF, and NTz-TP-COF before and after protonation with 0.5 M AA.

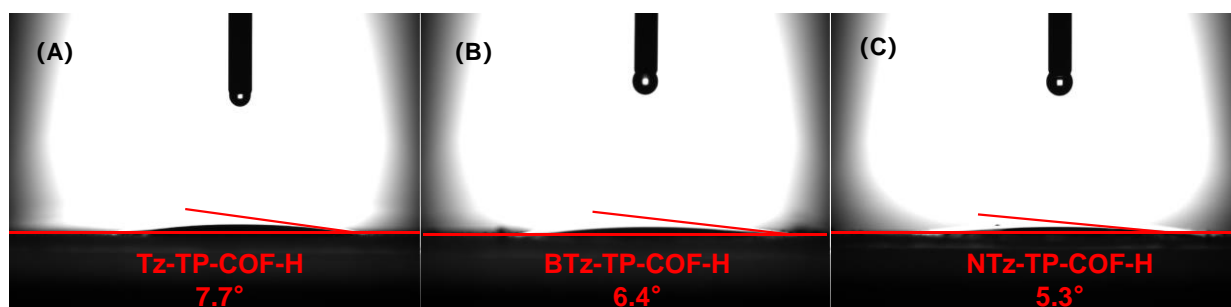

**Fig. S32.** Contact angles of Tz-TP-COF (A), BTz-TP-COF (B), and NTz-TP-COF (C) after immersion in 0.5 M AA.

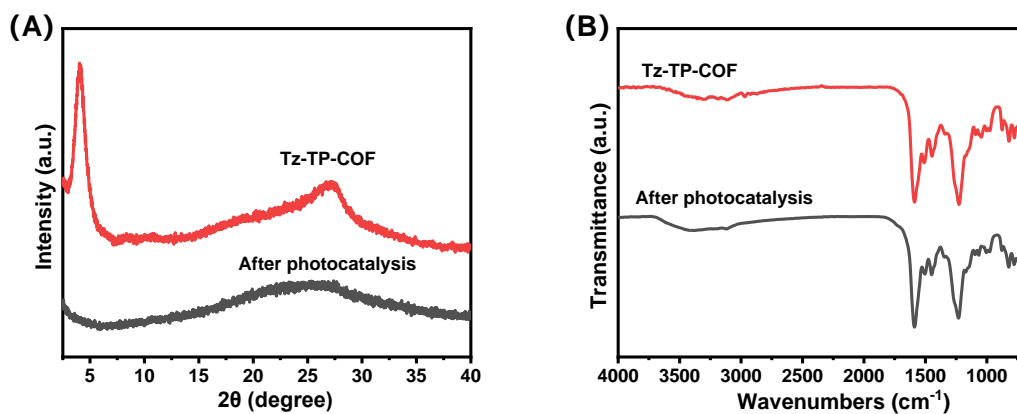

**Fig. S33.** (A) XRD patterns and (B) FT-IR spectra of 5mg Tz-TP-COF before and after the cyclic hydrogen evolution reaction test.

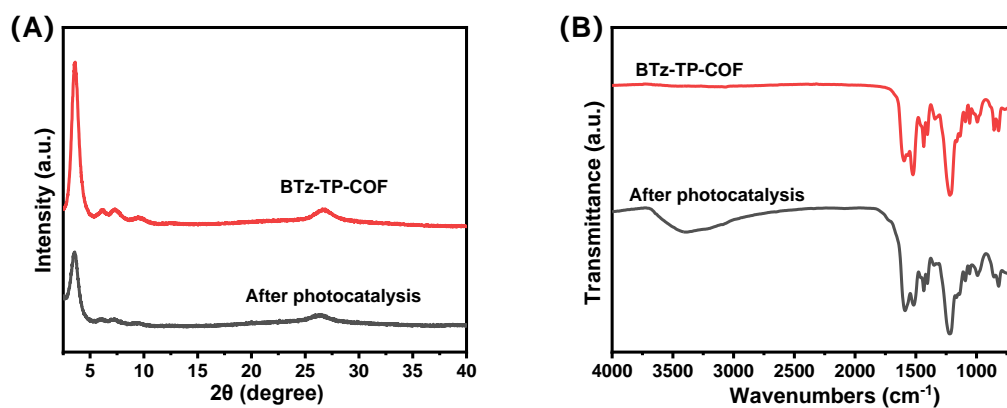

**Fig. S34.** (A) XRD patterns and (B) FT-IR spectra of 5mg BTz-TP-COF before and after the cyclic hydrogen evolution reaction test.

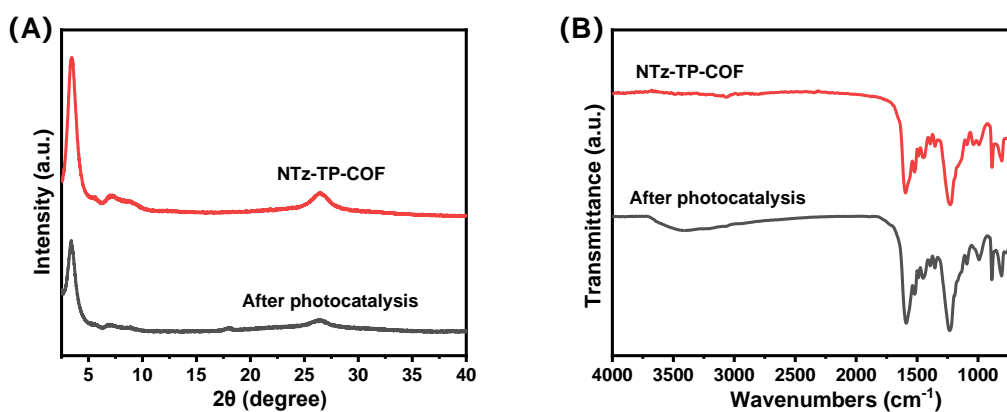

**Fig. S35.** (A) XRD patterns and (B) FT-IR spectra of 5mg NTz-TP-COF before and after the cyclic hydrogen evolution reaction test.

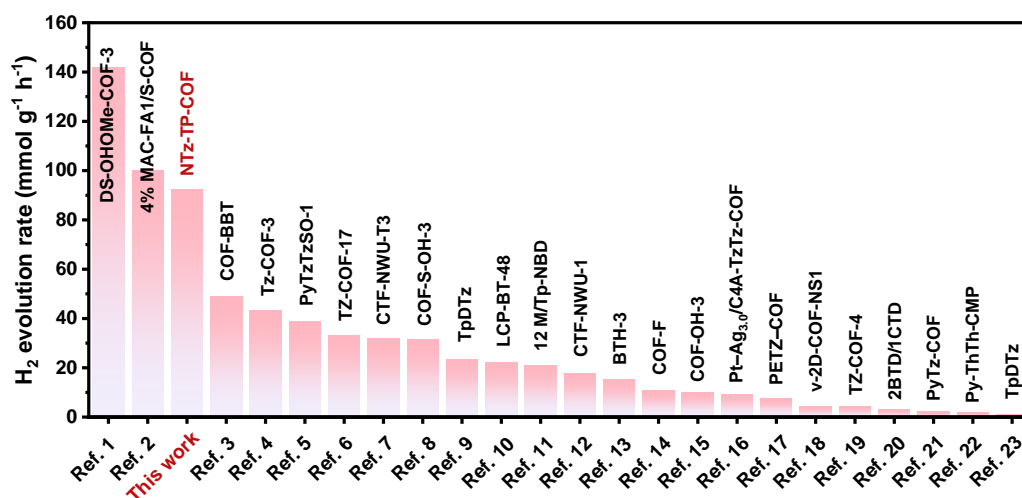

**Fig. S36.** Comparison of the photocatalytic hydrogen evolution performance in water of NTz-TP-COF with other representative thiazole-based and TP based conjugated polymer photocatalysts reported in the literature.<sup>1-23</sup>

**Table S1.** Hydrogen evolution rates of the three COFs from repeated experiments

| Sample     | HER (mmol g <sup>-1</sup> h <sup>-1</sup> ) |       |       |       | Mean ± SD    |
|------------|---------------------------------------------|-------|-------|-------|--------------|
|            | 1                                           | 2     | 3     | 4     |              |
| Tz-TP-COF  | 4.70                                        | 5.55  | 5.50  | 4.10  | 4.96 ± 0.69  |
| BTz-TP-COF | 29.15                                       | 31.60 | 29.55 | 35.05 | 31.34 ± 2.70 |
| NTz-TP-COF | 92.30                                       | 91.95 | 87.95 | 89.50 | 90.43 ± 2.07 |

Experiments conditions: 2 mg COF, 0.5 M AA, 3 wt% Pt,  $\lambda > 420$  nm.

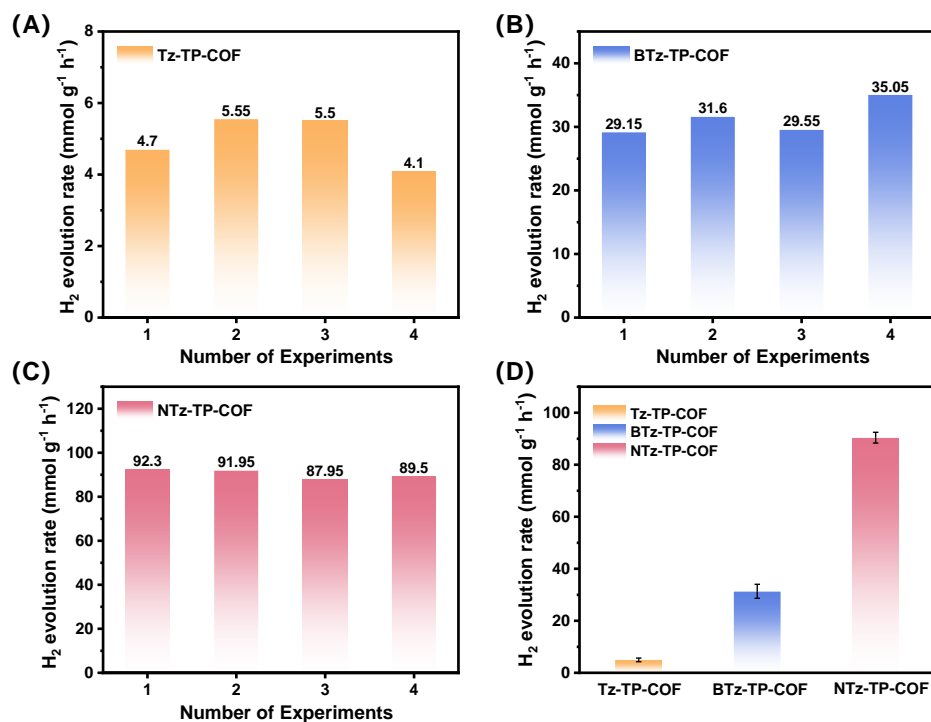

**Fig. S37.** (A-C) Photocatalytic hydrogen evolution rates of Tz-TP-COF (A), BTz-TP-COF (B), and NTz-TP-COF (C) from four independent photocatalytic experiments. (D) Average hydrogen evolution rates of the three COFs (with error bars). Experimental conditions: 2 mg COF, 0.5 M AA, 3 wt% Pt.

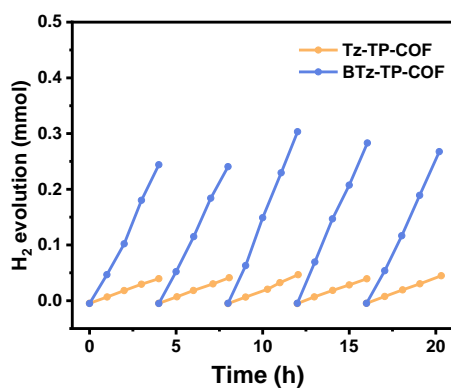

**Fig. S38.** Cycling tests over 20 h for 2 mg COFs as photocatalysts under visible light, with 0.5 M AA as sacrificial agent and 3 wt% Pt as co-catalyst.

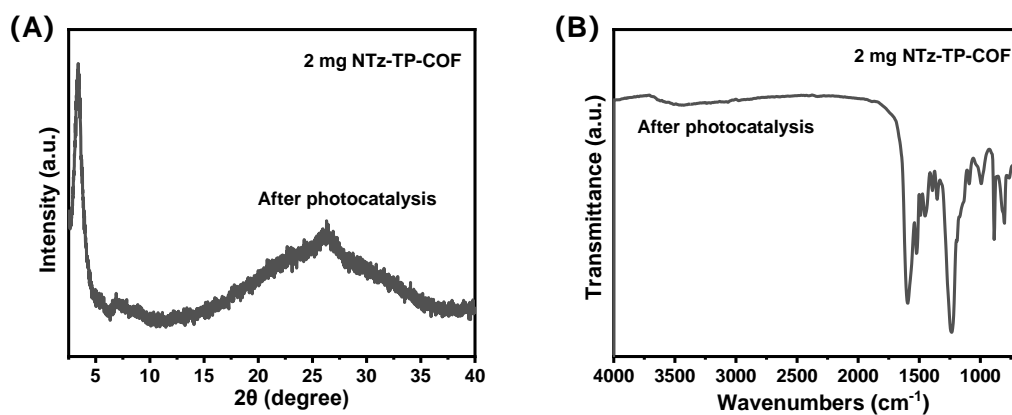

**Fig. S39** (A) PXRD pattern and (B) FT-IR spectrum of 2mg NTz-TP-COF after cyclic hydrogen evolution reaction testing.

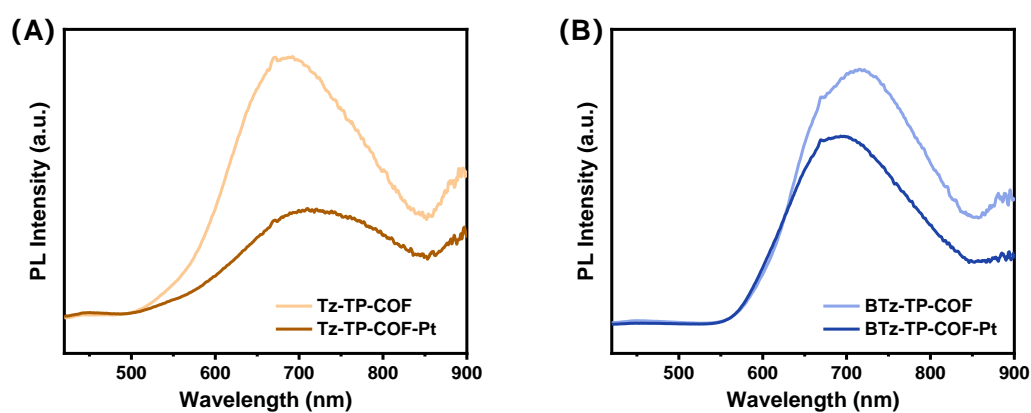

**Fig. S40.** (A) Steady-state photoluminescence (PL) spectra of Tz-TP-COF before and after Pt photodeposition. (B) Steady-state photoluminescence (PL) spectra of BTz-TP-COF before and after Pt photodeposition.

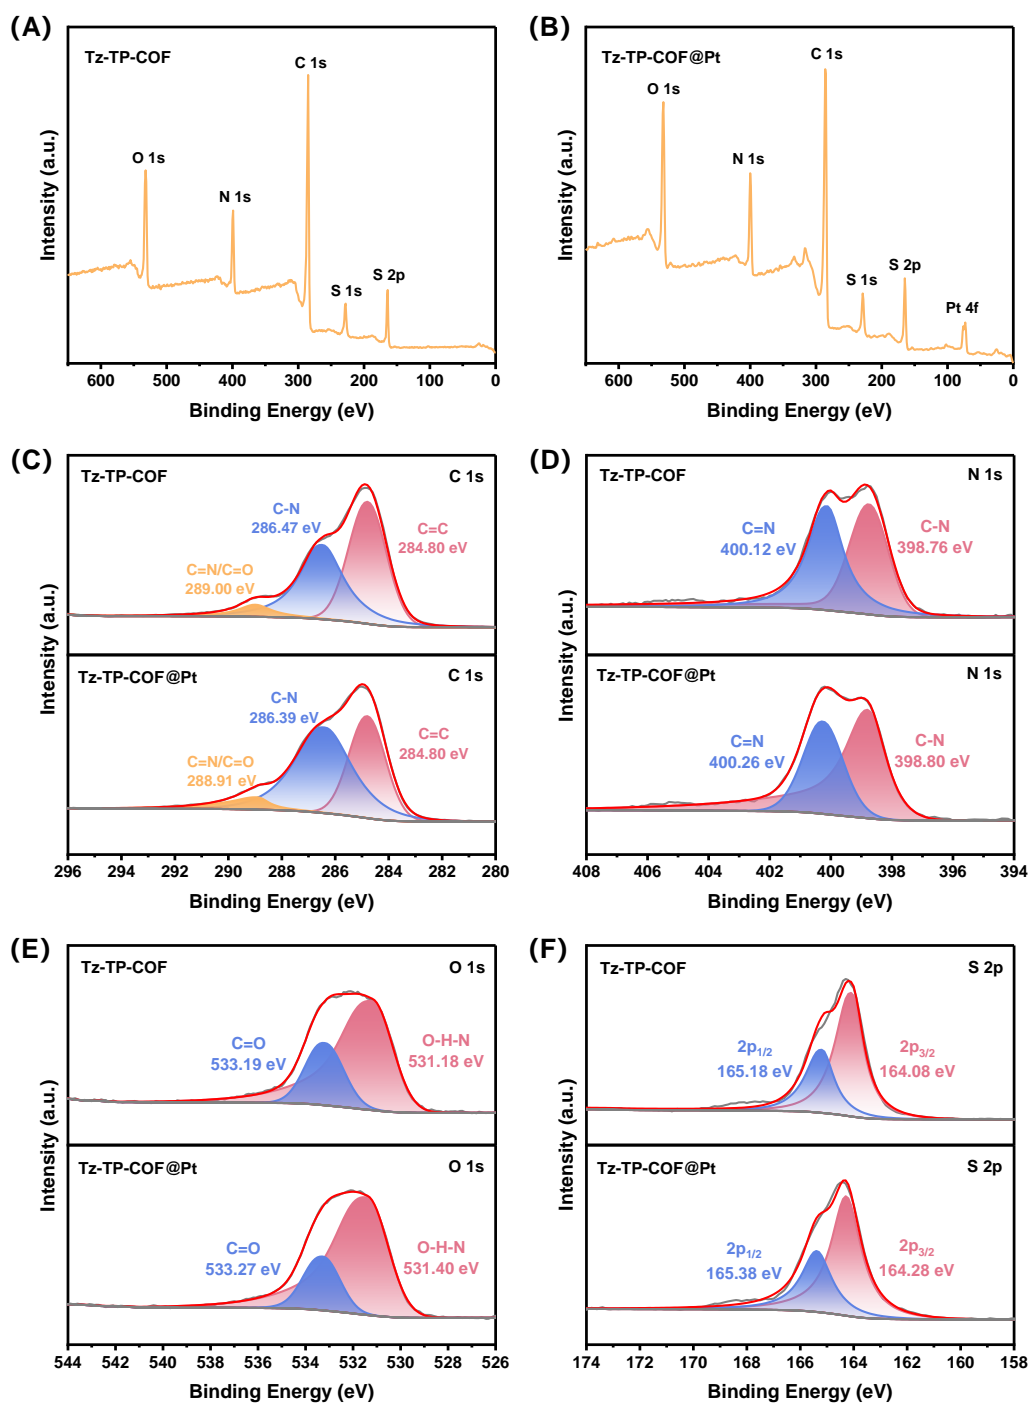

**Fig. S41.** (A) XPS survey spectra of Tz-TP-COF before photocatalysis. (B) XPS survey spectra of Tz-TP-COF after photocatalysis. (C) High resolution XPS spectra of C 1s for Tz-TP-COF before and after photocatalysis. (D) High resolution XPS spectra of N 1s for Tz-TP-COF before and after photocatalysis. (E) High resolution XPS spectra of O 1s for Tz-TP-COF before and after photocatalysis. (F) High resolution XPS spectra of S 2p for Tz-TP-COF before and after photocatalysis.

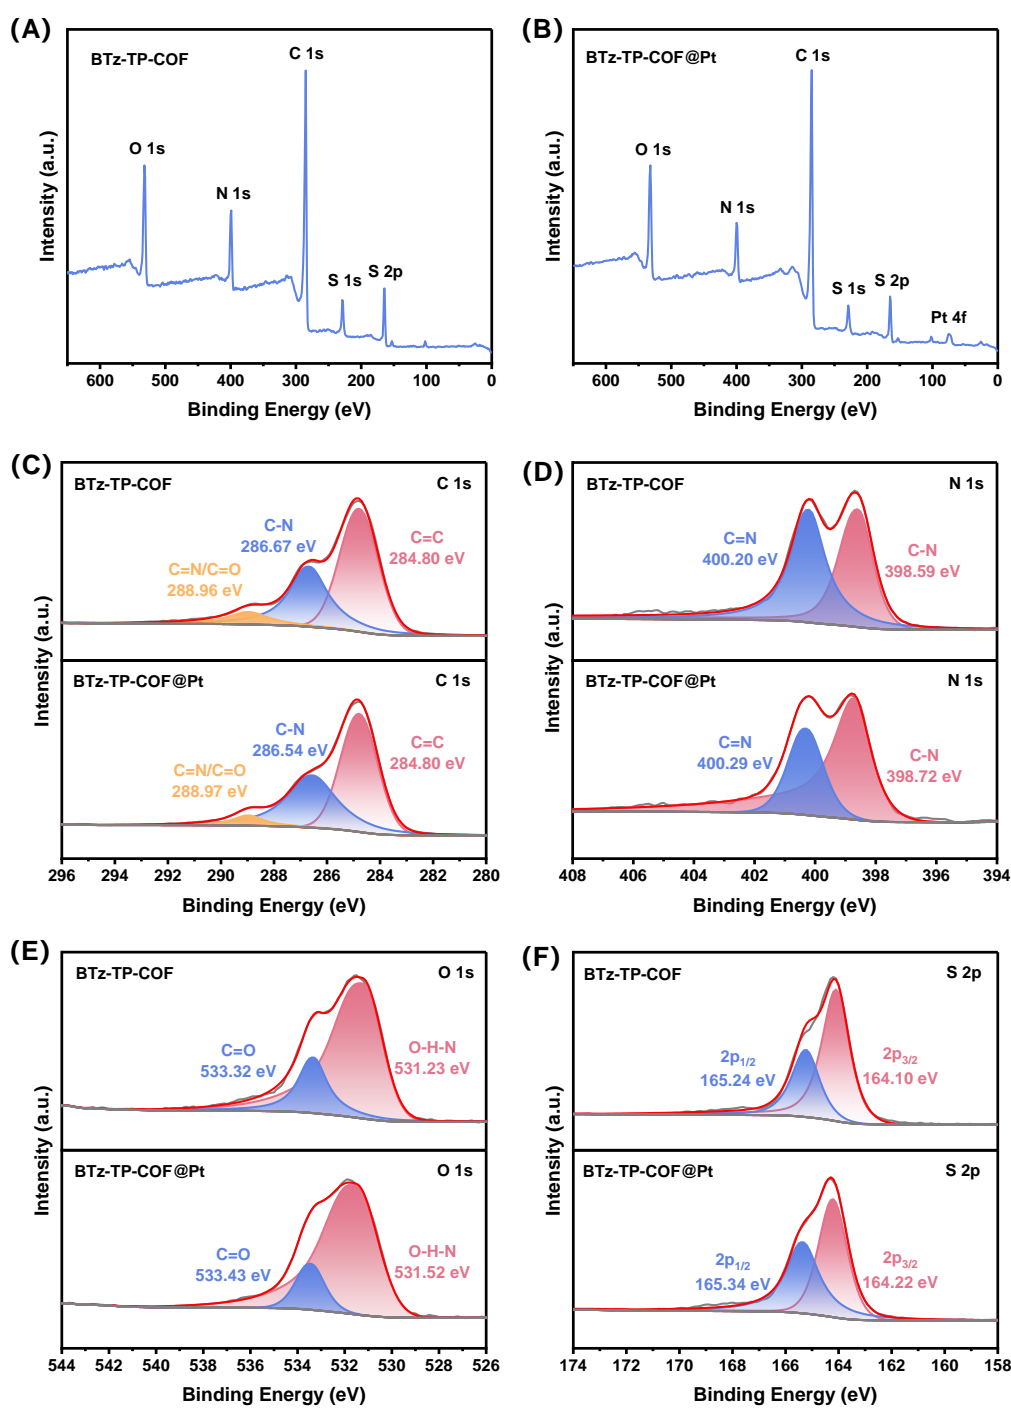

**Fig. S42.** (A) XPS survey spectra of BTz-TP-COF before photocatalysis. (B) XPS survey spectra of BTz-TP-COF after photocatalysis. (C) High resolution XPS spectra of C 1s for BTz-TP-COF before and after photocatalysis. (D) High resolution XPS spectra of N 1s for BTz-TP-COF before and after photocatalysis. (E) High resolution XPS spectra of O 1s for BTz-TP-COF before and after photocatalysis. (F) High resolution XPS spectra of S 2p for BTz-TP-COF before and after photocatalysis.

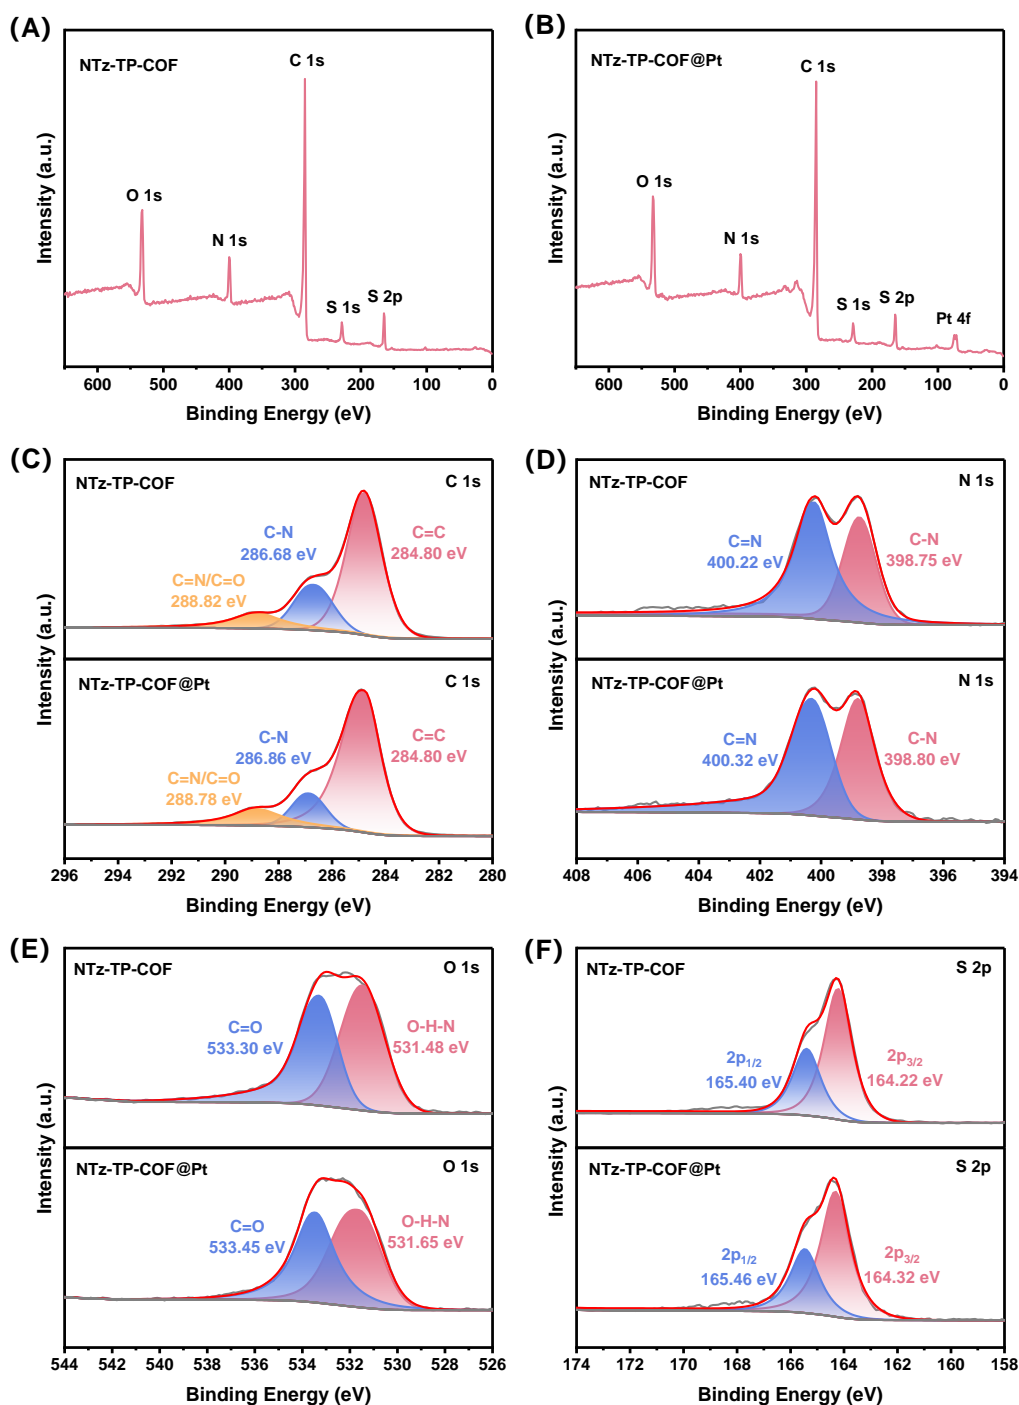

**Fig. S43.** (A) XPS survey spectra of NTz-TP-COF before photocatalysis. (B) XPS survey spectra of NTz-TP-COF after photocatalysis. (C) High resolution XPS spectra of C 1s for NTz-TP-COF before and after photocatalysis. (D) High resolution XPS spectra of N 1s for NTz-TP-COF before and after photocatalysis. (E) High resolution XPS spectra of O 1s for NTz-TP-COF before and after photocatalysis. (F) High resolution XPS spectra of S 2p for NTz-TP-COF before and after photocatalysis.

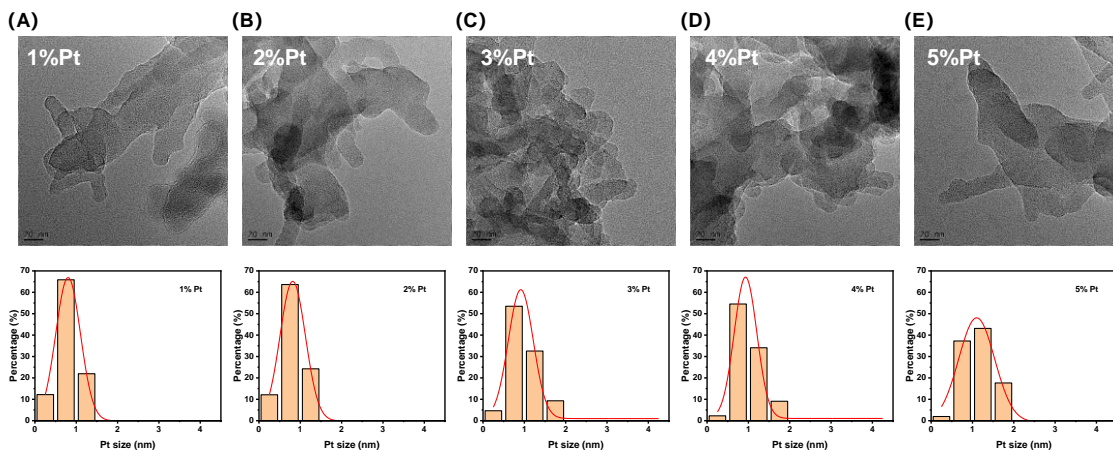

**Fig. S44.** HR-TEM images and photodeposited NPs size distributions of Tz-TP-COF at the Pt content of 1 wt%(A), 2 wt%(B), 3 wt%(C), 4 wt%(D), 5 wt%(E).

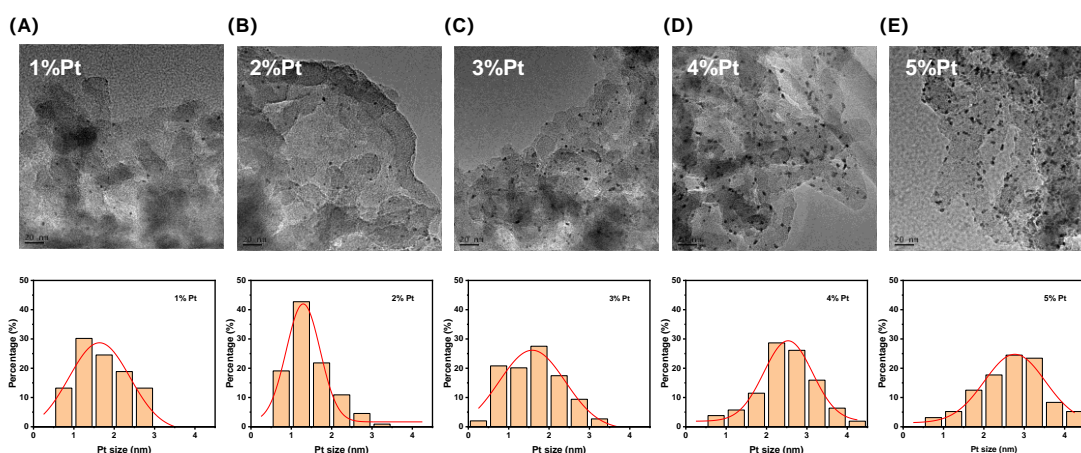

**Fig. S45.** HR-TEM images and photodeposited NPs size distributions of BTz-TP-COF at the Pt content of 1 wt%(A), 2 wt%(B), 3 wt%(C), 4 wt%(D), 5 wt%(E).

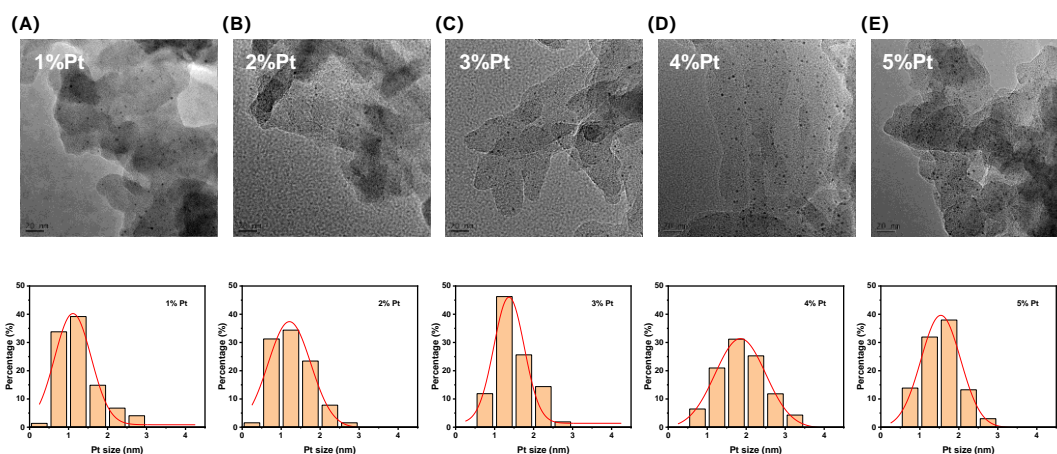

**Fig. S46.** HR-TEM images and photodeposited NPs size distributions of NTz-TP-COF at the Pt content of 1 wt%(A), 2 wt%(B), 3 wt%(C), 4 wt%(D), 5 wt%(E).

**Table S2.** Atomic coordinates of the simulated Tz-TP-COF based on AA-stacking mode.

| Space group     |         | P1                                                                                                                                |          |
|-----------------|---------|-----------------------------------------------------------------------------------------------------------------------------------|----------|
| Cell parameters |         | <b>a = 26.0822, b = 25.2521, c = 3.6479</b><br><b><math>\alpha = 88.6801, \beta = 91.1397, \gamma =</math></b><br><b>120.1965</b> |          |
| atoms           | x       | y                                                                                                                                 | z        |
| C1              | 0.08868 | -0.79272                                                                                                                          | 0.44757  |
| S2              | 0.12887 | -0.82868                                                                                                                          | 0.51076  |
| C3              | 0.18972 | -0.76128                                                                                                                          | 0.38209  |
| C4              | 0.17665 | -0.71586                                                                                                                          | 0.29889  |
| N5              | 0.11913 | -0.73376                                                                                                                          | 0.33675  |
| C6              | 0.22094 | -0.65353                                                                                                                          | 0.17759  |
| N7              | 0.27745 | -0.63705                                                                                                                          | 0.11087  |
| C8              | 0.30832 | -0.57762                                                                                                                          | 0.01     |
| S9              | 0.26976 | -0.53943                                                                                                                          | -0.00712 |
| C10             | 0.20896 | -0.60664                                                                                                                          | 0.12454  |
| N11             | 0.02621 | -0.82399                                                                                                                          | 0.4983   |
| N12             | 0.36976 | -0.54793                                                                                                                          | -0.0743  |
| C13             | 0.46009 | -0.55434                                                                                                                          | -0.15084 |
| C14             | 0.4911  | -0.58926                                                                                                                          | -0.0734  |
| C15             | 0.5535  | -0.56466                                                                                                                          | -0.19122 |
| C16             | 0.588   | -0.49901                                                                                                                          | -0.29729 |
| C17             | 0.56124 | -0.45996                                                                                                                          | -0.26446 |
| C18             | 0.49636 | -0.49083                                                                                                                          | -0.29612 |
| O19             | 0.47385 | -0.46468                                                                                                                          | -0.45754 |
| C20             | 0.59242 | -0.39927                                                                                                                          | -0.20455 |
| O21             | 0.63657 | -0.47851                                                                                                                          | -0.43777 |
| C22             | 0.58022 | -0.5986                                                                                                                           | -0.19464 |
| O23             | 0.46614 | -0.63643                                                                                                                          | 0.10971  |
| C24             | 0.40189 | -0.58047                                                                                                                          | -0.07007 |

|     |         |          |          |
|-----|---------|----------|----------|
| C25 | 0.68606 | -0.30348 | -0.03564 |
| S26 | 0.76056 | -0.26498 | 0.05293  |
| C27 | 0.75487 | -0.20143 | 0.11587  |
| C28 | 0.69779 | -0.21251 | 0.06929  |
| N29 | 0.65861 | -0.27063 | -0.01761 |
| C30 | 0.68073 | -0.16559 | 0.11134  |
| N31 | 0.7204  | -0.10706 | 0.18525  |
| C32 | 0.69325 | -0.07399 | 0.20683  |
| S33 | 0.6182  | -0.11292 | 0.13929  |
| C34 | 0.62342 | -0.17685 | 0.07795  |
| N35 | 0.65484 | -0.36695 | -0.11919 |
| N36 | 0.72532 | -0.00998 | 0.27571  |
| C37 | 0.57999 | -0.69458 | -0.01446 |
| S38 | 0.54517 | -0.77258 | 0.01957  |
| C39 | 0.61163 | -0.7639  | 0.1632   |
| C40 | 0.6558  | -0.7034  | 0.18142  |
| N41 | 0.63778 | -0.66398 | 0.07937  |
| C42 | 0.71704 | -0.68305 | 0.30237  |
| N43 | 0.73586 | -0.72237 | 0.38984  |
| C44 | 0.79356 | -0.69149 | 0.48623  |
| S45 | 0.82718 | -0.61345 | 0.47373  |
| C46 | 0.76048 | -0.62246 | 0.33393  |
| N47 | 0.54941 | -0.66365 | -0.12995 |
| N48 | 0.82532 | -0.722   | 0.58283  |
| C49 | 0.82622 | -0.81844 | 0.56591  |
| C50 | 0.79455 | -0.88548 | 0.63434  |
| C51 | 0.82123 | -0.92241 | 0.52185  |
| C52 | 0.88634 | -0.88985 | 0.47068  |
| C53 | 0.92161 | -0.82249 | 0.50706  |
| C54 | 0.88943 | -0.78876 | 0.45873  |

|     |         |          |          |
|-----|---------|----------|----------|
| O55 | 0.91452 | -0.73807 | 0.3135   |
| C56 | 0.98081 | -0.79108 | 0.56129  |
| O57 | 0.90992 | -0.91808 | 0.3684   |
| C58 | 0.78906 | -0.98309 | 0.45659  |
| O59 | 0.74822 | -0.90936 | 0.80453  |
| C60 | 0.79682 | -0.78761 | 0.60194  |
| H61 | 0.23379 | -0.75514 | 0.3663   |
| H62 | 0.16584 | -0.61148 | 0.16677  |
| H63 | 0.00633 | -0.86922 | 0.59593  |
| H64 | 0.39112 | -0.50041 | -0.10554 |
| H65 | 0.56823 | -0.37455 | -0.19653 |
| H66 | 0.62733 | -0.57588 | -0.25577 |
| H67 | 0.37871 | -0.62812 | 0.02192  |
| H68 | 0.79222 | -0.15726 | 0.18765  |
| H69 | 0.58563 | -0.22136 | 0.0178   |
| H70 | 0.67904 | -0.38953 | -0.09254 |
| H71 | 0.70073 | 0.01226  | 0.26987  |
| H72 | 0.61799 | -0.80199 | 0.23668  |
| H73 | 0.75342 | -0.58443 | 0.27322  |
| H74 | 0.50404 | -0.69053 | -0.18553 |
| H75 | 0.87012 | -0.69459 | 0.6527   |
| H76 | 1.00343 | -0.74122 | 0.55692  |
| H77 | 0.81263 | -1.00705 | 0.39297  |
| H78 | 0.74939 | -0.81353 | 0.65457  |

**Table S3.** Atomic coordinates of the simulated BTz-TP-COF based on AA-stacking mode.

| Space group     |         | P1                                                                                                                      |          |
|-----------------|---------|-------------------------------------------------------------------------------------------------------------------------|----------|
| Cell parameters |         | <b>a = 28.5869, b = 28.8170, c = 3.6127</b><br><b><math>\alpha = 90.0126, \beta = 91.0598, \gamma = 120.8772</math></b> |          |
| atoms           | x       | y                                                                                                                       | z        |
| C1              | 0.67295 | -0.21733                                                                                                                | 0.15998  |
| C2              | 0.72185 | -0.21593                                                                                                                | 0.13046  |
| C3              | 0.77173 | -0.16895                                                                                                                | 0.21212  |
| C4              | 0.77016 | -0.12336                                                                                                                | 0.32577  |
| C5              | 0.72119 | -0.12491                                                                                                                | 0.35729  |
| C6              | 0.67136 | -0.17183                                                                                                                | 0.27489  |
| S7              | 0.61786 | -0.2783                                                                                                                 | 0.0447   |
| C8              | 0.6632  | -0.2996                                                                                                                 | -0.03712 |
| N9              | 0.71647 | -0.26265                                                                                                                | 0.01858  |
| N10             | 0.72646 | -0.07824                                                                                                                | 0.4685   |
| C11             | 0.77972 | -0.04111                                                                                                                | 0.52057  |
| S12             | 0.82527 | -0.06198                                                                                                                | 0.43453  |
| N13             | 0.79642 | 0.01277                                                                                                                 | 0.62988  |
| N14             | 0.64641 | -0.3533                                                                                                                 | -0.15389 |
| C15             | 0.49299 | -0.5436                                                                                                                 | -0.42629 |
| C16             | 0.53306 | -0.5599                                                                                                                 | -0.51052 |
| C17             | 0.59167 | -0.52195                                                                                                                | -0.43461 |
| C18             | 0.61001 | -0.46411                                                                                                                | -0.44033 |
| C19             | 0.57296 | -0.44601                                                                                                                | -0.31025 |
| C20             | 0.51442 | -0.4879                                                                                                                 | -0.27819 |
| O21             | 0.48482 | -0.47716                                                                                                                | -0.10539 |
| C22             | 0.58996 | -0.39465                                                                                                                | -0.20425 |
| O23             | 0.65426 | -0.43246                                                                                                                | -0.56882 |
| C24             | 0.62794 | -0.53745                                                                                                                | -0.35883 |

|     |         |          |          |
|-----|---------|----------|----------|
| O25 | 0.51811 | -0.60287 | -0.66843 |
| C26 | 0.43925 | -0.57972 | -0.47579 |
| C27 | 0.16812 | -0.67639 | 0.02847  |
| C28 | 0.16898 | -0.72379 | 0.06144  |
| C29 | 0.21561 | -0.72584 | -0.01722 |
| C30 | 0.26146 | -0.67792 | -0.13117 |
| C31 | 0.26047 | -0.6306  | -0.16614 |
| C32 | 0.21388 | -0.62854 | -0.08702 |
| S33 | 0.10746 | -0.68342 | 0.14104  |
| C34 | 0.0857  | -0.75026 | 0.22819  |
| N35 | 0.12217 | -0.76589 | 0.17449  |
| N36 | 0.30735 | -0.5884  | -0.27713 |
| C37 | 0.34406 | -0.60384 | -0.3254  |
| S38 | 0.32255 | -0.67054 | -0.23584 |
| N39 | 0.39807 | -0.56577 | -0.43404 |
| N40 | 0.03206 | -0.78809 | 0.34632  |
| C41 | 0.7205  | -0.71346 | 0.14753  |
| C42 | 0.77031 | -0.6658  | 0.12795  |
| C43 | 0.77398 | -0.61712 | 0.0295   |
| C44 | 0.72514 | -0.61857 | -0.04922 |
| C45 | 0.67535 | -0.66625 | -0.02953 |
| C46 | 0.67168 | -0.7149  | 0.06916  |
| S47 | 0.72601 | -0.76731 | 0.27028  |
| C48 | 0.79554 | -0.72318 | 0.28892  |
| N49 | 0.81307 | -0.67115 | 0.20889  |
| N50 | 0.63258 | -0.66099 | -0.11179 |
| C51 | 0.65004 | -0.60904 | -0.19374 |
| S52 | 0.71954 | -0.5648  | -0.17362 |
| N53 | 0.61198 | -0.59274 | -0.28755 |
| N54 | 0.83346 | -0.73973 | 0.38119  |

|     |         |          |          |
|-----|---------|----------|----------|
| C55 | 0.87061 | -0.88998 | 0.63004  |
| C56 | 0.92835 | -0.84945 | 0.71819  |
| C57 | 0.94918 | -0.79165 | 0.64922  |
| C58 | 0.90908 | -0.7743  | 0.66077  |
| C59 | 0.85253 | -0.81182 | 0.52543  |
| C60 | 0.83533 | -0.86973 | 0.48463  |
| O61 | 0.79376 | -0.89977 | 0.3069   |
| C62 | 0.8175  | -0.79559 | 0.42306  |
| O63 | 0.92241 | -0.73039 | 0.79686  |
| C64 | 1.00134 | -0.7553  | 0.57079  |
| O65 | 0.95735 | -0.86333 | 0.87431  |
| C66 | 0.85271 | -0.94301 | 0.67411  |
| H67 | 0.80994 | -0.16781 | 0.18681  |
| H68 | 0.63315 | -0.17294 | 0.29921  |
| H69 | 0.7656  | 0.02114  | 0.67986  |
| H70 | 0.67725 | -0.3625  | -0.16052 |
| H71 | 0.55906 | -0.3851  | -0.13104 |
| H72 | 0.67064 | -0.50599 | -0.32329 |
| H73 | 0.4265  | -0.62101 | -0.55741 |
| H74 | 0.21633 | -0.76283 | 0.0111   |
| H75 | 0.21322 | -0.59151 | -0.11399 |
| H76 | 0.40687 | -0.52644 | -0.48591 |
| H77 | 0.02191 | -0.82844 | 0.34857  |
| H78 | 0.81293 | -0.57992 | 0.01446  |
| H79 | 0.63273 | -0.75212 | 0.08379  |
| H80 | 0.57093 | -0.62279 | -0.26976 |
| H81 | 0.87453 | -0.70951 | 0.37155  |
| H82 | 0.77594 | -0.8265  | 0.34538  |
| H83 | 1.01241 | -0.71331 | 0.53828  |
| H84 | 0.88198 | -0.95488 | 0.75462  |

**Table S4.** Atomic coordinates of the simulated NTz-TP-COF based on AA-stacking mode.

| Space group     |         | P1                                                                                                                      |          |
|-----------------|---------|-------------------------------------------------------------------------------------------------------------------------|----------|
| Cell parameters |         | <b>a = 30.1323, b = 29.4349, c = 3.6323</b><br><b><math>\alpha = 90.0695, \beta = 89.9305, \gamma = 119.9077</math></b> |          |
| atoms           | x       | y                                                                                                                       | z        |
| C1              | 0.82194 | 0.79448                                                                                                                 | 0.0117   |
| C2              | 0.77438 | 0.79251                                                                                                                 | -0.02763 |
| C3              | 0.72804 | 0.74503                                                                                                                 | 0.04606  |
| C4              | 0.73137 | 0.7012                                                                                                                  | 0.15588  |
| C5              | 0.77792 | 0.70348                                                                                                                 | 0.19045  |
| C6              | 0.82366 | 0.74962                                                                                                                 | 0.12022  |
| C7              | 0.68045 | 0.74296                                                                                                                 | 0.00615  |
| C8              | 0.67865 | 0.78766                                                                                                                 | -0.10454 |
| C9              | 0.72434 | 0.83374                                                                                                                 | -0.17582 |
| C10             | 0.77099 | 0.83629                                                                                                                 | -0.13907 |
| S11             | 0.77296 | 0.64561                                                                                                                 | 0.31974  |
| C12             | 0.70795 | 0.62075                                                                                                                 | 0.32381  |
| N13             | 0.69128 | 0.65407                                                                                                                 | 0.23281  |
| N14             | 0.811   | 0.88342                                                                                                                 | -0.21877 |
| C15             | 0.79423 | 0.91645                                                                                                                 | -0.31483 |
| S16             | 0.72897 | 0.89114                                                                                                                 | -0.31146 |
| N17             | 0.67334 | 0.56736                                                                                                                 | 0.41182  |
| N18             | 0.82963 | 0.96941                                                                                                                 | -0.40937 |
| C19             | 0.4886  | 0.42383                                                                                                                 | 0.49543  |
| C20             | 0.50465 | 0.3856                                                                                                                  | 0.60079  |
| C21             | 0.55907 | 0.4003                                                                                                                  | 0.57198  |
| C22             | 0.59671 | 0.45635                                                                                                                 | 0.60856  |
| C23             | 0.58386 | 0.49566                                                                                                                 | 0.46675  |
| C24             | 0.52931 | 0.47686                                                                                                                 | 0.37839  |

|     |         |         |          |
|-----|---------|---------|----------|
| O25 | 0.51859 | 0.50409 | 0.1869   |
| O26 | 0.63676 | 0.46934 | 0.7698   |
| O27 | 0.47369 | 0.34375 | 0.73765  |
| C28 | 0.61882 | 0.54627 | 0.398    |
| C29 | 0.57556 | 0.36611 | 0.50766  |
| C30 | 0.43839 | 0.40901 | 0.49931  |
| C31 | 0.20406 | 0.37329 | -0.10536 |
| C32 | 0.20372 | 0.32518 | -0.09089 |
| C33 | 0.24823 | 0.32397 | 0.02633  |
| C34 | 0.29154 | 0.37147 | 0.12506  |
| C35 | 0.29132 | 0.41809 | 0.1096   |
| C36 | 0.24817 | 0.42001 | -0.00475 |
| C37 | 0.24776 | 0.27579 | 0.04248  |
| C38 | 0.2034  | 0.22901 | -0.05404 |
| C39 | 0.16024 | 0.23097 | -0.16789 |
| C40 | 0.16033 | 0.27769 | -0.1881  |
| S41 | 0.34762 | 0.4708  | 0.24024  |
| C42 | 0.36913 | 0.42748 | 0.31251  |
| N43 | 0.33599 | 0.37659 | 0.24107  |
| N44 | 0.11593 | 0.2727  | -0.30382 |
| C45 | 0.08226 | 0.22186 | -0.36929 |
| S46 | 0.10349 | 0.17821 | -0.29061 |
| N47 | 0.41982 | 0.44477 | 0.43597  |
| N48 | 0.03167 | 0.2061  | -0.48904 |
| C49 | 0.62196 | 0.16781 | -0.06039 |
| C50 | 0.66797 | 0.21622 | -0.02992 |
| C51 | 0.66662 | 0.26203 | 0.07875  |
| C52 | 0.61884 | 0.25727 | 0.15462  |
| C53 | 0.57427 | 0.2099  | 0.12215  |
| C54 | 0.57483 | 0.16471 | 0.01515  |

|     |         |         |          |
|-----|---------|---------|----------|
| C55 | 0.7126  | 0.3105  | 0.1073   |
| C56 | 0.75968 | 0.31367 | 0.02899  |
| C57 | 0.76026 | 0.26844 | -0.07623 |
| C58 | 0.71577 | 0.22094 | -0.10471 |
| S59 | 0.52078 | 0.21307 | 0.22286  |
| C60 | 0.56104 | 0.27846 | 0.30784  |
| N61 | 0.61152 | 0.29661 | 0.26147  |
| N62 | 0.72316 | 0.18143 | -0.20595 |
| C63 | 0.77355 | 0.19941 | -0.25337 |
| S64 | 0.81372 | 0.26534 | -0.17784 |
| N65 | 0.54189 | 0.31191 | 0.41658  |
| N66 | 0.79145 | 0.16455 | -0.35486 |
| C67 | 0.84763 | 0.05605 | -0.58245 |
| C68 | 0.90309 | 0.07716 | -0.63229 |
| C69 | 0.93944 | 0.13245 | -0.53654 |
| C70 | 0.9175  | 0.16518 | -0.40696 |
| C71 | 0.86263 | 0.14799 | -0.46886 |
| C72 | 0.8295  | 0.09388 | -0.60764 |
| O73 | 0.78869 | 0.08077 | -0.75774 |
| O74 | 0.94349 | 0.20458 | -0.22493 |
| O75 | 0.91866 | 0.05033 | -0.77734 |
| C76 | 0.845   | 0.18072 | -0.37853 |
| C77 | 0.99025 | 0.15029 | -0.55849 |
| C78 | 0.814   | 0.0054  | -0.51041 |
| H79 | 0.85739 | 0.83055 | -0.0433  |
| H80 | 0.85983 | 0.75045 | 0.14855  |
| H81 | 0.64501 | 0.70689 | 0.06126  |
| H82 | 0.64246 | 0.78673 | -0.13462 |
| H83 | 0.68953 | 0.54361 | 0.44872  |
| H84 | 0.86826 | 0.98083 | -0.37868 |

|      |         |          |          |
|------|---------|----------|----------|
| H85  | 0.60485 | 0.57208  | 0.30725  |
| H86  | 0.61671 | 0.3813   | 0.49965  |
| H87  | 0.41059 | 0.36832  | 0.55959  |
| H88  | 0.17032 | 0.37448  | -0.19502 |
| H89  | 0.24909 | 0.45723  | -0.01667 |
| H90  | 0.28147 | 0.27456  | 0.13231  |
| H91  | 0.20227 | 0.1917   | -0.03888 |
| H92  | 0.44278 | 0.48475  | 0.49045  |
| H93  | 0.02323 | 0.23591  | -0.53922 |
| H94  | 0.6227  | 0.1328   | -0.14429 |
| H95  | 0.53923 | 0.12795  | -0.01012 |
| H96  | 0.71188 | 0.34554  | 0.19069  |
| H97  | 0.79527 | 0.3505   | 0.05175  |
| H98  | 0.50222 | 0.29566  | 0.40667  |
| H99  | 0.76348 | 0.12503  | -0.36587 |
| H100 | 0.87279 | 0.22047  | -0.29559 |
| H101 | 1.00311 | 0.12277  | -0.62971 |
| H102 | 0.77361 | -0.00628 | -0.4935  |

### Section III. Supplementary References

1. Y. Xu, Y. Lang, N. Sun, X. Ci, R. Tu, C. Yang, X. Fang, T. Liu, L. Yang, C.-C. Liu, W.-Q. Deng and Z. Li, *ACS Catal.*, 2025, **15**, 18976-18986.
2. X. A. Li, Z. Z. Liang, Y. C. Zhou, J. F. Huang, X. L. Wang, L. M. Xiao and J. M. Liu, *Aggregate*, 2024, **5**, e442.
3. W. Huang, Y. Hu, Z. Qin, Y. Ji, X. Zhao, Y. Wu, Q. He, Y. Li, C. Zhang, J. Lu and Y. Li, *Natl. Sci. Rev.*, 2023, **10**, nwac171.
4. F. Liu, Y. He, X. Liu, Z. Wang, H.-L. Liu, X. Zhu, C.-C. Hou, Y. Weng, Q. Zhang and Y. Chen, *ACS Catal.*, 2022, **12**, 9494-9502.
5. A. F. Saber, H.-T. Liao, P.-J. Li, Y.-F. Chen, L. Mabuti, S.-W. Kuo, J. Lüder and A. F. M. El-Mahdy, *J. Colloid Interface Sci.*, 2025, **699**, 138156.
6. Z. Jia, N. Ji, J. Qi, T. Wang, Y. Che, Z. Zhao, J. Zhao, Z. Jiao, K. Wang, W. Zhang and W. H. Zhu, *Angew. Chem. Int. Ed.*, 2025, **64**, e202511245.
7. H. Wang, L. Shi, Z. Qu, L. Zhang, X. Wang, Y. Wang, S. Liu, H. Ma and Z. Guo, *ACS Appl. Mater. Interfaces*, 2024, **16**, 2296-2308.
8. Y. Chen, F. Duan, J. Zhang, S.-C. Xu, S.-B. Ren, L. Zhang and D.-M. Han, *ACS Appl. Mater. Interfaces*, 2025, **17**, 29504-29514.
9. H. Hou, K. Wu, X. Chen, X. Liu and Y. Zhao, *J. Am. Chem. Soc.*, 2025, **147**, 27835-27846.
10. Y. Hu, X. Ding, J. Feng, Y. Yan, C. Shao, X. Yu, J. Shao, Y. Ji, Y. Li, W. Huang and Y. Li, *Adv. Funct. Mater.*, 2024, **34**, 2400946.
11. S. A. Z. Naqvi, A. U. R. Baloch, U. Y. Umna, K. Muzaffar, T. S. Aslam, J. Chen and Y. Wang, *J. Mater. Chem. A*, 2025, **13**, 30419-30426.
12. H. Wang, L. Guan, J. Liu, T. Lei, Y. Xue, Z. Qu, S. Jin, H. Ma and Z. Guo, *J. Mater. Chem. A*, 2022, **10**, 16328-16336.
13. Y. Wang, W. Hao, H. Liu, R. Chen, Q. Pan, Z. Li and Y. Zhao, *Nat. Commun.*, 2022, **13**, 100.
14. M. Wang, Z. Wang, M. Shan, J. Wang, Z. Qiu, J. Song and Z. Li, *Chem. Mater.*, 2023, **35**, 5368-5377.
15. Y. Chen, X. Luo, J. Zhang, L. Hu, T. Xu, W. Li, L. Chen, M. Shen, S.-B. Ren, D.-M. Han, G.-H. Ning and D. Li, *J. Mater. Chem. A*, 2022, **10**, 24620-24627.
16. Z. Qu, S. Liu, Y. Wang, J. Yang, Y. Zhang, J. Zhang, Y. Gao, H. Ma and Z. Guo, *ACS Appl. Polym. Mater.*, 2024, **6**, 4756-4768.
17. H. Yu, J. Zhang, X. Yan, C. Wu, X. Zhu, B. Li, T. Li, Q. Guo, J. Gao, M. Hu and J. Yang, *J. Mater. Chem. A*, 2022, **10**, 11010-11018.
18. S. Li, R. Ma, S. Xu, T. Zheng, H. Wang, G. Fu, H. Yang, Y. Hou, Z. Liao, B. Wu, X. Feng, L.-Z. Wu, X.-B. Li and T. Zhang, *ACS Catal.*, 2023, **13**, 1089-1096.
19. K. Wang, Z. Jia, Y. Bai, X. Wang, S. E. Hodgkiss, L. Chen, S. Y. Chong, X. Wang, H. Yang, Y. Xu, F. Feng, J. W. Ward and A. I. Cooper, *J. Am. Chem. Soc.*, 2020, **142**, 11131-11138.
20. X.-L. Wang, X.-R. Ren, Z. Xu, P.-K. Zhou, Z.-Y. Li and D. Wang, *ACS Appl. Polym. Mater.*, 2026, **8**, 3459-3465.
21. W. Li, X. Huang, T. Zeng, Y. A. Liu, W. Hu, H. Yang, Y. B. Zhang and K. Wen, *Angew. Chem. Int. Ed.*, 2020, **60**, 1869-1874.
22. M. Mohamed Samy, I. M. A. Mekhemer, M. G. Mohamed, M. Hammad Elsayed, K.-H. Lin, Y.-K. Chen, T.-L. Wu, H.-H. Chou and S.-W. Kuo, *Chem. Eng. J.*, 2022, **446**, 137158.
23. B. P. Biswal, H. A. Vignolo-González, T. Banerjee, L. Grunenber, G. Savasci, K. Gottschling, J. Nuss, C. Ochsenfeld and B. V. Lotsch, *J. Am. Chem. Soc.*, 2019, **141**, 11082-11092.
